# Supplementary material
Source: MDPI journal article supplement (https://www.mdpi.com/search?q=catalysts-10-00981)
Supplement: s001 [file catalysts-10-00981-s001.pdf]

## Supplementary Materials

### Eosin Y-catalyzed visible-light-mediated aerobic transformation of pyrazolidine-3-one derivatives

Nejc Petek, Uroš Grošelj, Jurij Svete, Franc Požgan, Drago Kočar, Bogdan Štefane\*

<sup>1</sup> Faculty of Chemistry and Chemical Technology, University of Ljubljana, Večna pot 113, SI-1000Ljubljana Slovenia; Bogdan.stefane@fkkt.uni-lj.si

\* Correspondence: Bogdan.stefane@fkkt.uni-lj.si; Tel.: +386-1-4798560

#### 1. Cyclic voltammetry

Cyclic voltammograms were recorded on ElectroSyn 2.0 (IKA, Staufen im Breisgau, Germany) on glassy carbon working electrode with Pt plated counter electrode and Ag wire quasi-reference electrode. Solution of **1c** (10 mM) was prepared in acetonitrile with Bu<sub>4</sub>NBF<sub>4</sub> (50 mM) as an electrolyte. Ferrocene was added as an internal standard.

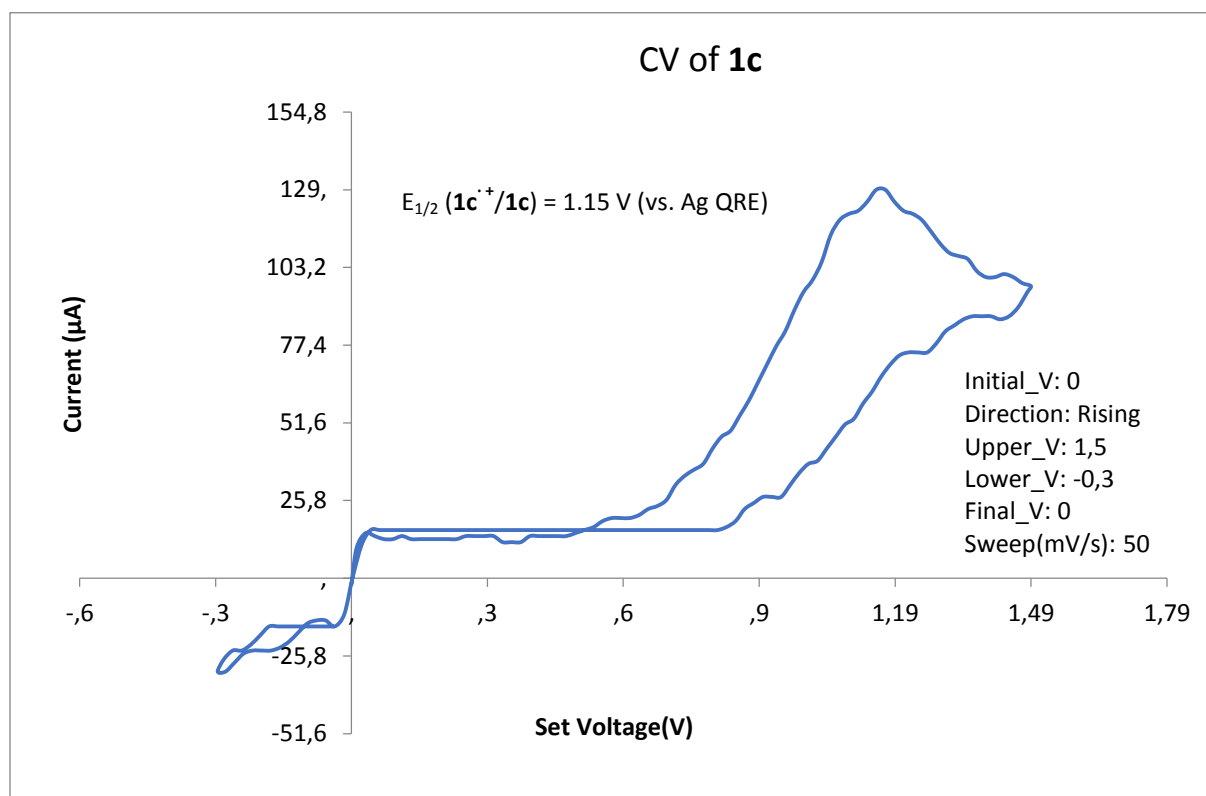

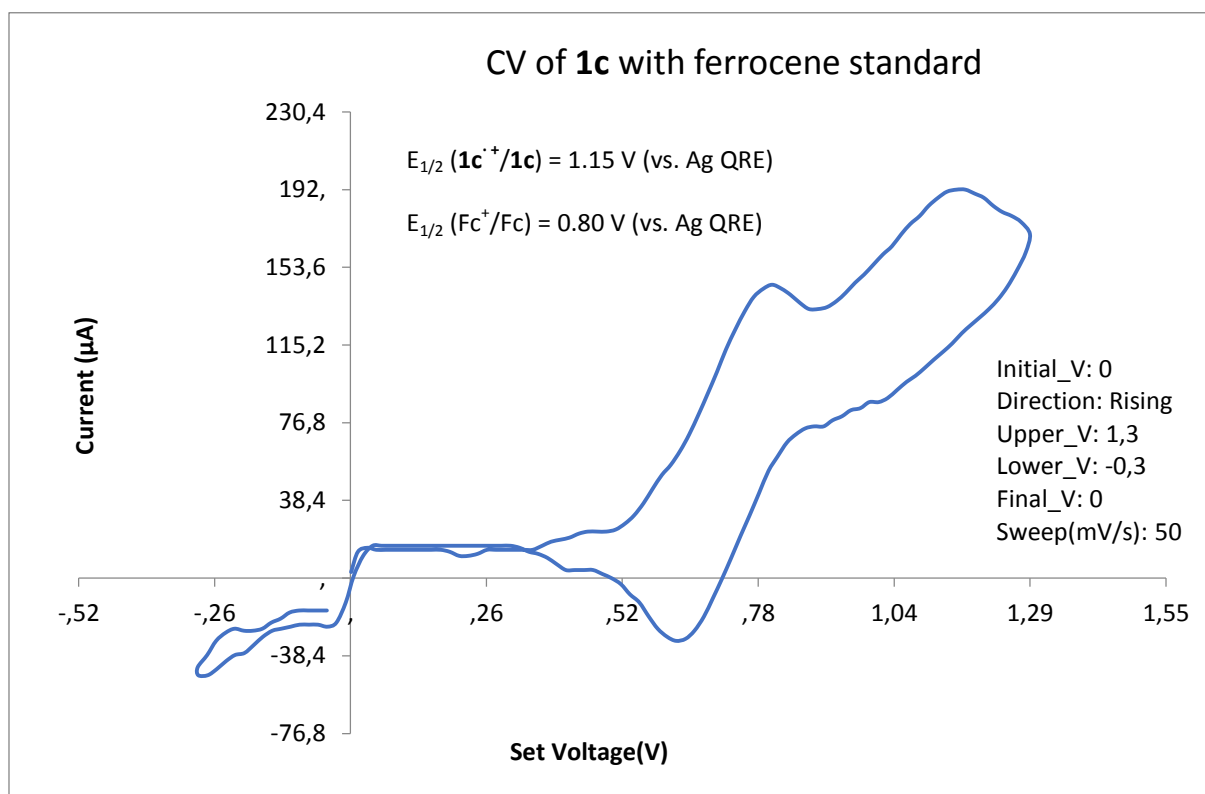

Literature potential for  $\text{Fc}^+/\text{Fc}$  vs. SCE is 0.38 V in acetonitrile.

$$E_{1/2}(\mathbf{1c}^+/\mathbf{1c}) = 0.35 \text{ V (vs. Fc)}$$

$$E_{1/2}(\mathbf{1c}^+/\mathbf{1c}) = 0.73 \text{ V (vs. SCE)}$$

Aranzaes, J. R., Daniel, M.-C., Astruc, D. Metallocenes as references for the determination of redox potentials by cyclic voltammetry. – Permethylated iron and cobalt sandwich complexes, inhibition by polyamine dendrimers, and the role of hydroxy-containing ferrocenes. *Can. J. Chem.* **2006**, *84*, 288–299.

## 2. Absorption spectroscopy

Absorption spectra of Eosin Y-disodium salt was recorded on Cary 50 Bio UV-VIS Spectrophotometer (Agilent Technologies, Santa Clara, CA, USA). Normalized spectra recorded in acetonitrile and acetonitrile/TFA (0.5M solution as used herein for oxidation of compounds **1**) is shown.

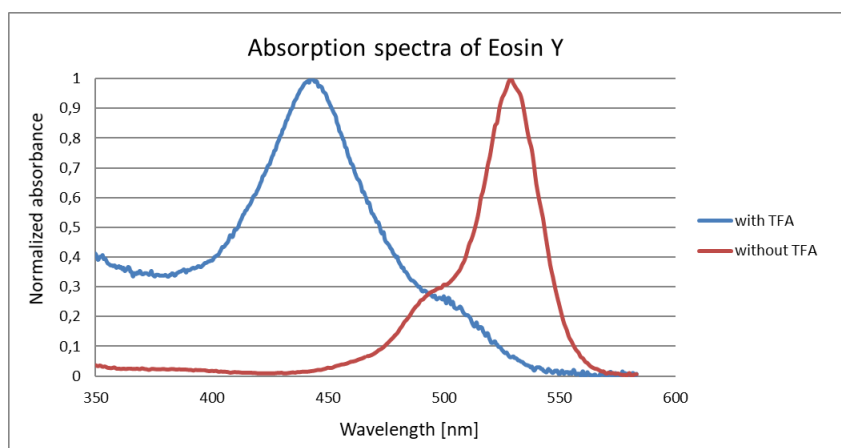

### 3. Mass spectrometry

TEMPO adduct of **1c** was detected on Agilent 6224 Accurate Mass TOF LC/MS spectrometer.

#### Compound Identification Results

| Ion Mass | Calc Ion Mass | Difference | IonFormula       | IonSpecies         | Best |
|----------|---------------|------------|------------------|--------------------|------|
| 394.2247 | 394.2242      | -0.4       | C19 H31 Cl N6 O  | (M+H) <sup>+</sup> |      |
| 394.2247 | 394.2256      | 0.9        | C21 H33 Cl N3 O2 | (M+H) <sup>+</sup> | ✓    |

MFE MS Zoomed Spectrum

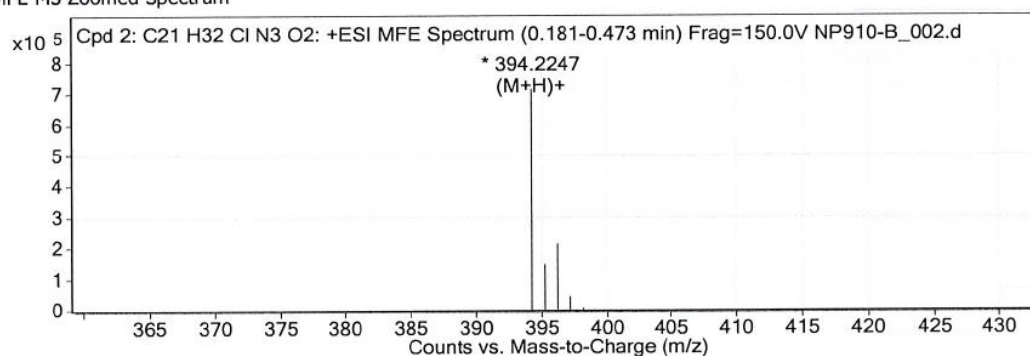

We confirmed the presence of endo and exo oxidation products of **1q** on mass spectrometer Shimadzu LCMS-IT-TOF system (Kyoto, Japan) with liquid chromatograph Nexera XR hyphenated to a mass spectrometer with ion trap and time of flight tube equipped with an electrospray ionization (ESI) source. Starting material ( $m/z$  191.1179) is also present. Estimated ratio of endo and exo oxidation according to NMR analysis is 3:2 respectively.

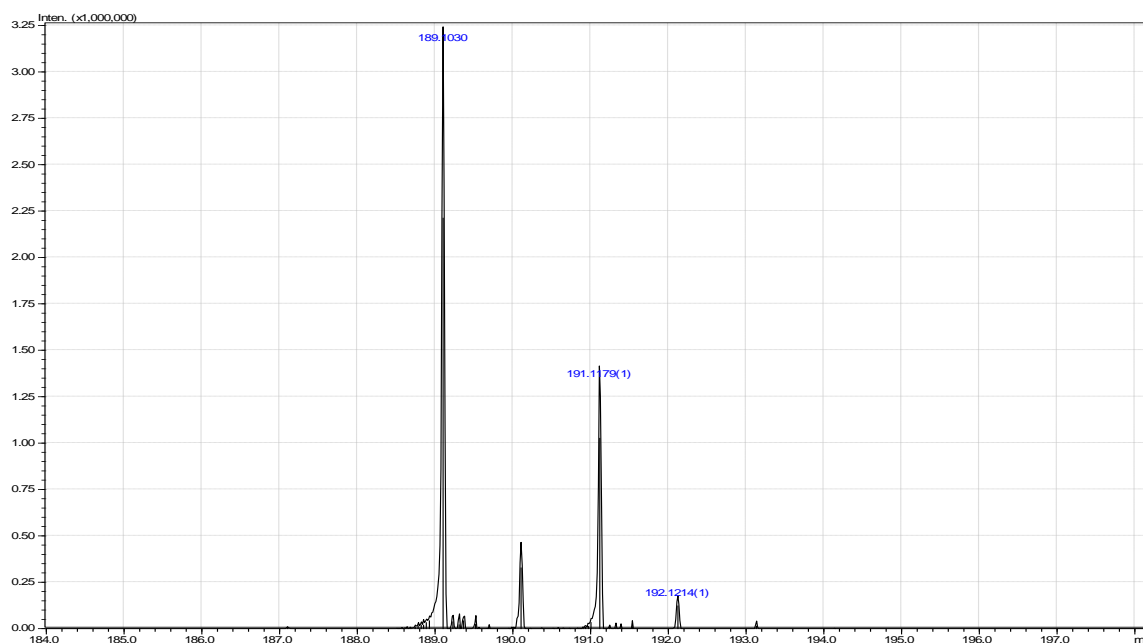

| No. | Mass     | Diff (mDa) | Formula      | DBE  |
|-----|----------|------------|--------------|------|
| 1   | 188.0950 | 0.8        | C11 H12 N2 O | 7.0  |
| 2   | 188.0909 | 4.8        | C6 H12 N4 O3 | 3.0  |
| 3   | 188.0797 | 16.0       | C7 H12 N2 O4 | 3.0  |
| 4   | 188.1121 | 16.3       | C3 H16 N4 O5 | -2.0 |

#### 4. Characterization of compounds 1–5.

##### General Remarks

Reactions were carried out in a commercially available SynLED Parallel Photoreactor (465–470 nm LEDs, 130–140 lm, Sigma-Aldrich, St. Louis, MO, USA), which operates at approximately 25–30 °C. The NMR spectra were recorded in deuterated solvents with Me<sub>4</sub>Si as the internal standard on a Bruker Avance DPX 300 (Bruker, Billerica, MA, USA) and Bruker Avance III UltraShield 500 (Bruker, Billerica, MA, USA) plus instruments at 300 and 500 MHz for <sup>1</sup>H and at 75.5 and 126 MHz for <sup>13</sup>C nuclei, respectively. Data for <sup>1</sup>H NMR are reported as chemical shifts (δ) in ppm, integration, multiplicity (s = singlet, d = doublet, t = triplet, q = quartet, m = multiplet), coupling constant and assignment. Data for <sup>13</sup>C are reported as chemical shift (δ) in ppm. Mass spectra were recorded on Agilent 6224 Accurate Mass TOF LC/MS spectrometer (Agilent Technologies, Santa Clara, CA, USA) and IR spectra on a Bruker FTIR Alpha Platinum spectrophotometer (Bruker, Billerica, MA, USA). Melting points were determined on a Kofler hot-stage microscope and on a MPA100 OptiMelt automated melting point system (Stanford Research Systems, Sunnyvale, CA, USA). Thin-layer chromatography (TLC) was performed on aluminum backed silica plates (0.2 mm, 60 F254, Sigma-Aldrich, St. Louis, MO, USA). Visualization of TLC (254 nm, Camag, Muttenz, Switzerland) was performed by fluorescence quenching or with potassium permanganate stains. Flash column chromatography (FC) and column chromatography (CC) were performed on silica gel (particle size: 35–70 μm, Sigma-Aldrich, St. Louis, MO, USA). Commercially available compounds were used without further purification.

##### Pyrazolidin-3-ones 1.

Compounds **1a–p** were prepared according to established literature procedures [1–4].

1-Benzyl-5,5-dimethyl-pyrazolidinone (**1a**). The <sup>1</sup>H-NMR data is in agreement with literature. [1]

5,5-Dimethyl-1-(4-methylbenzyl)pyrazolidin-3-one (**1b**). White solid (84%); mp 121–122 °C;  $\nu_{\max}/\text{cm}^{-1}$  (ATR) 3159, 3047, 2971, 2923, 1690, 1514, 1444, 1420, 1385, 1340, 1293, 1247, 1204, 1169, 1107, 1080, 1057, 1024, 985, 945, 922, 888, 850, 811, 788, 746, 709, 684;  $\delta_{\text{H}}$  (500 MHz; CDCl<sub>3</sub>; Me<sub>4</sub>Si) 1.35 (s, 6H), 2.34 (s, 3H), 2.40 (s, 2H), 3.73 (s, 2H), 6.61 (s, 1H), 7.13 (d,  $J = 7.9$  Hz, 2H), 7.20 (d,  $J = 7.9$  Hz, 2H);  $\delta_{\text{C}}$  (126 MHz; CDCl<sub>3</sub>; Me<sub>4</sub>Si) 21.1, 25.3, 43.0, 56.6, 62.3, 129.1, 129.4, 133.9, 137.5, 174.0; HRMS (ESI): MH<sup>+</sup>, found 219.1492. [C<sub>13</sub>H<sub>19</sub>N<sub>2</sub>O]<sup>+</sup> requires 219.1492.

1-(4-Chlorobenzyl)-5,5-dimethylpyrazolidin-3-one (**1c**). White solid (99%); mp 155–156 °C;  $\nu_{\max}/\text{cm}^{-1}$  (ATR) 3143, 3049, 2974, 1690, 1596, 1488, 1450, 1411, 1385, 1373, 1337, 1289, 1245, 1206, 1167, 1113, 1089, 1051, 1016, 989, 972, 846, 922, 889, 851, 807, 787, 749, 707, 687, 664;  $\delta_{\text{H}}$  (500 MHz; CDCl<sub>3</sub>; Me<sub>4</sub>Si) 1.35 (s, 6H), 2.39 (s, 2H), 3.76 (s, 2H), 6.82 (s, 1H), 7.26 (d,  $J = 8.5$  Hz, 2H), 7.31 (d,  $J = 8.4$  Hz, 2H);  $\delta_{\text{C}}$  (126 MHz; CDCl<sub>3</sub>; Me<sub>4</sub>Si) 25.4, 42.7, 56.4, 62.6, 128.8, 130.5, 133.5, 135.6, 174.3; HRMS (ESI): MH<sup>+</sup>, found 239.0946. [C<sub>12</sub>H<sub>16</sub>ClN<sub>2</sub>O]<sup>+</sup> requires 239.0946.

4-((5,5-Dimethyl-3-oxopyrazolidin-1-yl)methyl)benzotrile (**1d**). White solid (90%); mp 156–158 °C;  $\nu_{\max}/\text{cm}^{-1}$  (ATR) 3153, 3054, 2974, 2858, 2228, 1690, 1610, 1505, 1468, 1448, 1418, 1374, 1339, 1293, 1248, 1209, 1167, 1111, 1079, 1049, 1023, 990, 973, 949, 925, 893, 860, 823, 793, 753, 689;  $\delta_{\text{H}}$  (500 MHz; CDCl<sub>3</sub>; Me<sub>4</sub>Si) 1.35 (s, 6H), 2.39 (s, 2H), 3.86 (s, 2H), 7.25 (s, 1H), 7.47 (d,  $J = 8.2$  Hz, 2H), 7.63 (d,  $J = 8.2$  Hz, 2H);  $\delta_{\text{C}}$  (126 MHz; CDCl<sub>3</sub>; Me<sub>4</sub>Si) 25.4, 42.6, 57.0, 62.9, 111.6, 118.7, 129.7, 132.4, 142.9, 174.7; HRMS (ESI): MH<sup>+</sup>, found 230.1290. [C<sub>13</sub>H<sub>16</sub>N<sub>3</sub>O]<sup>+</sup> requires 230.1288.

1-(4-Methoxy-benzyl)-5,5-dimethyl-pyrazolidin-3-one (**1e**). The <sup>1</sup>H-NMR data is in agreement with literature. [2]

5,5-Dimethyl-1-(4-nitrobenzyl)pyrazolidin-3-one (**1f**). Pale yellow solid (85%); mp 186–187 °C;  $\nu_{\max}/\text{cm}^{-1}$  (ATR) 3141, 3061, 2977, 2852, 1693, 1602, 1513, 1450, 1374, 1350, 1333, 1292, 1250, 1208, 1169, 1112, 1074, 1044, 1016, 985, 953, 926, 895, 873, 857, 832, 818, 755, 738, 697, 650;  $\delta_{\text{H}}$  (500 MHz;  $\text{CDCl}_3$ ;  $\text{Me}_4\text{Si}$ ) 1.36 (s, 6H), 2.40 (s, 2H), 3.91 (s, 2H), 7.25 (s, 1H), 7.53 (d,  $J = 8.8$  Hz, 2H), 8.20 (d,  $J = 8.8$  Hz, 2H);  $\delta_{\text{C}}$  (126 MHz;  $\text{CDCl}_3$ ;  $\text{Me}_4\text{Si}$ ) 25.5, 42.5, 56.7, 63.0, 123.8, 129.7, 144.9, 147.5, 174.7; HRMS (ESI):  $\text{MH}^+$ , found 250.1187.  $[\text{C}_{12}\text{H}_{16}\text{N}_3\text{O}_3]^+$  requires 250.1186.

1-(2,6-Dichlorobenzyl)-5,5-dimethylpyrazolidin-3-one (**1g**). White solid (93%); mp 154–155 °C;  $\nu_{\max}/\text{cm}^{-1}$  (ATR) 3143, 3052, 2969, 1697, 1581, 1561, 1465, 1432, 1381, 1369, 1335, 1288, 1242, 1196, 1165, 1109, 1090, 1054, 1006, 967, 940, 922, 891, 843, 774, 762, 682, 625;  $\delta_{\text{H}}$  (500 MHz;  $\text{CDCl}_3$ ;  $\text{Me}_4\text{Si}$ ) 1.41 (s, 6H), 2.43 (s, 2H), 4.15 (s, 2H), 6.83 (s, 1H), 7.18 (t,  $J = 8.0$  Hz, 1H), 7.32 (d,  $J = 8.0$  Hz, 2H);  $\delta_{\text{C}}$  (126 MHz;  $\text{CDCl}_3$ ;  $\text{Me}_4\text{Si}$ ) 25.2, 42.6, 51.5, 63.4, 128.8, 129.7, 132.4, 137.0, 174.7; HRMS (ESI):  $\text{MH}^+$ , found 273.0556.  $[\text{C}_{12}\text{H}_{15}\text{Cl}_2\text{N}_2\text{O}]^+$  requires 273.0556.

5,5-Dimethyl-1-(3,4,5-trimethoxybenzyl)pyrazolidin-3-one (**1h**). White solid (98%); mp 132–133 °C;  $\nu_{\max}/\text{cm}^{-1}$  (ATR) 3445, 3332, 3154, 3071, 2966, 2931, 2839, 1673, 1590, 1506, 1449, 1417, 1377, 1328, 1229, 1178, 1121, 1048, 1007, 962, 925, 886, 832, 796, 781, 748, 669, 613;  $\delta_{\text{H}}$  (500 MHz;  $\text{CDCl}_3$ ;  $\text{Me}_4\text{Si}$ ) 1.37 (s, 6H), 2.42 (s, 2H), 3.72 (s, 2H), 3.83 (s, 3H), 3.87 (s, 6H), 6.55 (s, 2H), 6.73 (s, 1H);  $\delta_{\text{C}}$  (126 MHz;  $\text{CDCl}_3$ ;  $\text{Me}_4\text{Si}$ ) 25.2, 43.1, 56.1, 57.2, 60.9, 62.3, 105.8, 132.6, 137.4, 153.4, 174.0; HRMS (ESI):  $\text{MH}^+$ , found 295.1652.  $[\text{C}_{15}\text{H}_{23}\text{N}_2\text{O}_4]^+$  requires 295.1652.

1-(2-Naphthylmethyl)-5,5-dimethyl-pyrazolidinone (**1i**). The  $^1\text{H-NMR}$  data is in agreement with literature. [1]

Benzyl (1-benzyl-5,5-dimethyl-3-oxopyrazolidin-4-yl)carbamate (**1j**). The  $^1\text{H-NMR}$  data is in agreement with literature. [5]

5,5-Dimethyl-1-pyridin-3-ylmethyl-pyrazolidin-3-one (**1k**). The  $^1\text{H-NMR}$  data is in agreement with literature. [4]

1-(Furan-2-ylmethyl)-5,5-dimethylpyrazolidin-3-one (**1l**). Colorless oil (84%);  $\nu_{\max}/\text{cm}^{-1}$  (ATR) 3189, 2973, 1682, 1505, 1421, 1387, 1371, 1330, 1245, 1223, 1147, 1115, 1077, 1014, 974, 922, 885, 800, 734, 663;  $\delta_{\text{H}}$  (500 MHz;  $\text{CDCl}_3$ ;  $\text{Me}_4\text{Si}$ ) 1.33 (s, 6H), 2.30 (s, 2H), 3.82 (s, 2H), 6.28 (d,  $J = 3.1$  Hz, 1H), 6.33 (dd,  $J = 3.2, 1.9$  Hz, 1H), 7.39 (d,  $J = 1.7$  Hz, 1H), 7.84 (s, 1H);  $\delta_{\text{C}}$  (126 MHz;  $\text{CDCl}_3$ ;  $\text{Me}_4\text{Si}$ ) 25.2, 42.7, 49.6, 62.5, 109.5, 110.5, 142.6, 150.4, 174.6; HRMS (ESI):  $\text{MH}^+$ , found 195.1125.  $[\text{C}_{10}\text{H}_{15}\text{N}_2\text{O}_2]^+$  requires 195.1128.

1-Ethyl-5,5-dimethylpyrazolidin-3-one (**1m**). The  $^1\text{H-NMR}$  data is in agreement with literature. [1]

Benzyl [(4*RS*,5*RS*)-1-benzyl-3-oxo-5-(propan-2-yl)pyrazolidin-4-yl]carbamate (**1n**). The  $^1\text{H-NMR}$  data is in agreement with literature. [5]

5,5-Dimethyl-1-(3-phenylpropyl)pyrazolidin-3-one (**1o**). White solid (77%); mp 130–132 °C;  $\nu_{\max}/\text{cm}^{-1}$  (ATR) 3051, 2964, 2848, 1687, 1649, 1491, 1453, 1415, 1385, 1340, 1239, 1124, 1024, 944, 922, 887, 796, 749, 725, 702, 679;  $\delta_{\text{H}}$  (500 MHz;  $\text{CDCl}_3$ ;  $\text{Me}_4\text{Si}$ ) 1.22 (s, 6H), 1.83 (p,  $J = 7.3$  Hz, 2H), 2.32 (s, 2H), 2.62 (t,  $J = 7.2$  Hz, 2H), 2.69 (t,  $J = 7.5$  Hz, 2H), 7.14 – 7.23 (m, 3H), 7.24 – 7.33 (m, 2H), 8.80 (s, 1H);  $\delta_{\text{C}}$  (126 MHz;  $\text{CDCl}_3$ ;  $\text{Me}_4\text{Si}$ ) 25.2, 29.3, 33.0, 42.9, 51.7, 62.5, 125.8, 128.3, 128.5, 141.7, 175.1; HRMS (ESI):  $\text{MH}^+$ , found 233.1651.  $[\text{C}_{14}\text{H}_{21}\text{N}_2\text{O}]^+$  requires 233.1648.

5,5-Dimethyl-1-propylpyrazolidin-3-one (**1p**). Colorless oil (50%);  $\nu_{\max}/\text{cm}^{-1}$  (ATR) 3182, 2966, 1681, 1466, 1366, 1244, 1026, 888, 784;  $\delta_{\text{H}}$  (500 MHz;  $\text{CDCl}_3$ ;  $\text{Me}_4\text{Si}$ ) 0.94 (t,  $J = 7.4$  Hz, 3H), 1.26 (s, 6H), 1.46 –

1.58 (m, 2H), 2.34 (s, 2H), 2.54 – 2.63 (m, 2H), 8.61 (s, 1H);  $\delta_c$  (126 MHz;  $\text{CDCl}_3$ ;  $\text{Me}_4\text{Si}$ ) 11.6, 21.4, 25.1, 42.9, 54.5, 62.4, 175.0; HRMS (ESI):  $\text{MH}^+$ , found 157.1335.  $[\text{C}_8\text{H}_{17}\text{N}_2\text{O}]^+$  requires 157.1335.

1-Ethyl-5-phenylpyrazolidin-3-one (**1q**). White solid (98%); mp 99–101 °C;  $\nu_{\text{max}}/\text{cm}^{-1}$  (ATR) 2982, 2843, 1679, 1496, 1455, 1427, 1373, 1334, 1163, 1116, 1098, 1077, 1026, 986, 908, 872, 818, 800, 757, 702, 652, 636;  $\delta_{\text{H}}$  (500 MHz;  $\text{CDCl}_3$ ;  $\text{Me}_4\text{Si}$ ) 1.13 (t,  $J = 7.2$  Hz, 3H), 2.55 (dd,  $J = 16.8, 8.9$  Hz, 1H), 2.66 (dq,  $J = 12.0, 7.0$  Hz, 1H), 2.85 (dq,  $J = 12.0, 7.3$  Hz, 1H), 3.01 (dd,  $J = 16.8, 8.5$  Hz, 1H), 4.10 (t,  $J = 8.7$  Hz, 1H), 7.28 – 7.43 (m, 5H), 8.49 (s, 1H);  $\delta_c$  (126 MHz;  $\text{CDCl}_3$ ;  $\text{Me}_4\text{Si}$ ) 12.9, 39.4, 52.8, 67.5, 127.0, 127.9, 128.7, 140.1, 173.0; HRMS (ESI):  $\text{MH}^+$ , found 191.1180.  $[\text{C}_{11}\text{H}_{15}\text{N}_2\text{O}]^+$  requires 191.1179.

1-Ethyl-5-methylpyrazolidin-3-one (**1r**) was prepared according to a literature procedure (omitting the hydrobromide formation). [6]

### Azomethine imines 2.

(Z)-1-Benzylidene-5,5-dimethyl-3-oxopyrazolidin-1-ium-2-ide (**2a**). Prepared from **1a** (61%). The  $^1\text{H}$ -NMR data is in agreement with literature. [7]

(Z)-5,5-Dimethyl-1-(4-methylbenzylidene)-3-oxopyrazolidin-1-ium-2-ide (**2b**). Prepared from **1b** (63%). The  $^1\text{H}$ -NMR data is in agreement with literature. [8]

(Z)-1-(4-Chlorobenzylidene)-5,5-dimethyl-3-oxopyrazolidin-1-ium-2-ide (**2c**). Prepared from **1c** (62%). The  $^1\text{H}$ -NMR data is in agreement with literature. [8]

(Z)-1-(4-Cyanobenzylidene)-5,5-dimethyl-3-oxopyrazolidin-1-ium-2-ide (**2d**). Prepared from **1d** (48%). The  $^1\text{H}$ -NMR data is in agreement with literature. [8]

(Z)-1-(4-Methoxybenzylidene)-5,5-dimethyl-3-oxopyrazolidin-1-ium-2-ide (**2e**). Prepared from **1e** (76%). The  $^1\text{H}$ -NMR data is in agreement with literature. [8]

(Z)-5,5-Dimethyl-1-(4-nitrobenzylidene)-3-oxopyrazolidin-1-ium-2-ide (**2f**). Prepared from **1f** (34%). The  $^1\text{H}$ -NMR data is in agreement with literature. [9]

(Z)-1-(2,6-Dichlorobenzylidene)-5,5-dimethyl-3-oxopyrazolidin-1-ium-2-ide (**2g**). Prepared from **1g** (88%). The  $^1\text{H}$ -NMR data is in agreement with literature. [9]

(Z)-5,5-Dimethyl-3-oxo-1-(3,4,5-trimethoxybenzylidene)pyrazolidin-1-ium-2-ide (**2h**). Prepared from **1h** (71%). The  $^1\text{H}$ -NMR data is in agreement with literature. [9]

(Z)-5,5-Dimethyl-1-(naphthalen-2-ylmethylene)-3-oxopyrazolidin-1-ium-2-ide (**2i**). Prepared from **1i** (73%). The  $^1\text{H}$ -NMR data is in agreement with literature. [10]

(Z)-1-Benzylidene-4-(((benzyloxy)carbonyl)amino)-5,5-dimethyl-3-oxopyrazolidin-1-ium-2-ide (**2j**). Prepared from **1j** (44%). The  $^1\text{H}$ -NMR data is in agreement with literature. [5]

(Z)-5,5-Dimethyl-3-oxo-1-(pyridin-3-ylmethylene)pyrazolidin-1-ium-2-ide (**2k**). Prepared from **1k**. Pale yellow solid (40%); mp 197–199 °C;  $\nu_{\text{max}}/\text{cm}^{-1}$  (ATR) 2978, 1665, 1590, 1579, 1559, 1477, 1468, 1431, 1397, 1380, 1295, 1247, 1232, 1143, 1094, 1026, 948, 866, 849, 810, 705, 672, 638, 611;  $\delta_{\text{H}}$  (500 MHz;  $\text{CDCl}_3$ ;  $\text{Me}_4\text{Si}$ ) 1.75 (s, 6H), 2.73 (s, 2H), 7.22 (s, 1H), 7.38 (dd,  $J = 8.2, 4.8$  Hz, 1H), 8.59 (dd,  $J = 4.8, 1.7$  Hz, 1H), 8.99 (d,  $J = 2.2$  Hz, 1H), 9.17 (dt,  $J = 8.4, 2.0$  Hz, 1H);  $\delta_c$  (126 MHz;  $\text{CDCl}_3$ ;  $\text{Me}_4\text{Si}$ ) 28.9, 44.3, 74.6, 123.7, 126.3, 126.4, 138.0, 151.4, 152.1, 182.0; HRMS (ESI):  $\text{MH}^+$ , found 204.1130.  $[\text{C}_{11}\text{H}_{14}\text{N}_3\text{O}]^+$  requires 204.1131.

(*Z*)-1-(Furan-2-ylmethylene)-5,5-dimethyl-3-oxopyrazolidin-1-ium-2-ide (**2l**). Prepared from **1l**. Off-white solid (42%); mp 137–145 °C;  $\nu_{\max}/\text{cm}^{-1}$  (ATR) 3097, 1664, 1595, 1558, 1479, 1467, 1427, 1408, 1392, 1311, 1272, 1204, 1143, 1097, 1002, 938, 884, 832, 816, 767, 672, 652, 625;  $\delta_{\text{H}}$  (500 MHz;  $\text{CDCl}_3$ ;  $\text{Me}_4\text{Si}$ ) 1.67 (s, 6H), 2.73 (s, 2H), 6.63 (ddd,  $J = 3.7, 1.8, 0.7$  Hz, 1H), 7.18 (s, 1H), 7.59 (dd,  $J = 1.8, 0.7$  Hz, 1H), 7.91 (d,  $J = 3.6$  Hz, 1H);  $\delta_{\text{C}}$  (126 MHz;  $\text{CDCl}_3$ ;  $\text{Me}_4\text{Si}$ ) 28.8, 44.9, 72.4, 113.7, 118.6, 121.1, 146.2, 146.3, 181.4; HRMS (ESI):  $\text{MH}^+$ , found 193.0976.  $[\text{C}_{10}\text{H}_{13}\text{N}_2\text{O}_2]^+$  requires 193.0972.

(*Z*)-1-Ethylidene-5,5-dimethyl-3-oxopyrazolidin-1-ium-2-ide (**2m**). Prepared from **1m** (47%). The  $^1\text{H}$ -NMR data is in agreement with literature. [11]

### Pyrazolo[1,2-*a*]pyrazoles 3.

Methyl 1-(4-chlorophenyl)-7,7-dimethyl-5-oxo-6,7-dihydro-1*H*,5*H*-pyrazolo[1,2-*a*]pyrazole-2-carboxylate (**3a**). Prepared from **1c** (80%). The  $^1\text{H}$ -NMR data is in agreement with literature. [12]

Methyl 7,7-dimethyl-5-oxo-1-(3,4,5-trimethoxyphenyl)-6,7-dihydro-1*H*,5*H*-pyrazolo[1,2-*a*]pyrazole-2-carboxylate (**3b**). Prepared from **1h** (82%). The  $^1\text{H}$ -NMR data is in agreement with literature. [12]

Methyl 7,7-dimethyl-1-(4-nitrophenyl)-5-oxo-6,7-dihydro-1*H*,5*H*-pyrazolo[1,2-*a*]pyrazole-2-carboxylate (**3c**). Prepared from **1f** (73%). The  $^1\text{H}$ -NMR data is in agreement with literature. [12]

tert-Butyl ((*S*)-1-((1*S*)-7,7-dimethyl-1-(4-nitrophenyl)-5-oxo-6,7-dihydro-1*H*,5*H*-pyrazolo[1,2-*a*]pyrazol-2-yl)-1-oxopropan-2-yl)carbamate (**3d**). Prepared from **1f** (30%). The  $^1\text{H}$ -NMR data is in agreement with literature. [13]

Methyl (1*S*\*,6*R*\*,7*R*\*)-6-benzyloxycarbonylamino-7-isopropyl-1-(4-nitrophenyl)-5-oxo-6,7-dihydro-1*H*,5*H*-pyrazolo[1,2-*a*]pyrazole-2-carboxylate (**3e**). Prepared from **1n** (52%). The  $^1\text{H}$ -NMR data is in agreement with literature. [14]

Methyl 7,7-dimethyl-5-oxo-1-phenethyl-6,7-dihydro-1*H*,5*H*-pyrazolo[1,2-*a*]pyrazole-2-carboxylate (**3f**). Prepared from **1o**. Yellow resin (62%);  $\nu_{\max}/\text{cm}^{-1}$  (ATR) 2951, 1732, 1693, 1601, 1496, 1453, 1399, 1331, 1261, 1202, 1117, 1037, 997, 968, 890, 824, 746, 699;  $\delta_{\text{H}}$  (500 MHz;  $\text{CDCl}_3$ ;  $\text{Me}_4\text{Si}$ ) 1.05 (s, 3H), 1.33 (s, 3H), 1.93 (dddd,  $J = 14.0, 10.9, 5.8, 3.4$  Hz, 3H), 2.06 (ddt,  $J = 13.7, 10.6, 6.0$  Hz, 1H), 2.32 (d,  $J = 15.5$  Hz, 1H), 2.72 (qdd,  $J = 13.7, 10.5, 5.7$  Hz, 2H), 2.83 (d,  $J = 15.6$  Hz, 1H), 3.73 (s, 3H), 4.54 (ddd,  $J = 6.0, 3.3, 1.3$  Hz, 1H), 7.14 – 7.22 (m, 3H), 7.24 – 7.30 (m, 2H), 7.46 (d,  $J = 1.3$  Hz, 1H);  $\delta_{\text{C}}$  (126 MHz;  $\text{CDCl}_3$ ;  $\text{Me}_4\text{Si}$ ) 18.3, 25.0, 30.9, 37.0, 48.8, 51.5, 60.3, 65.0, 115.2, 125.7, 128.3, 128.4, 131.8, 141.9, 164.4, 168.6; HRMS (ESI):  $\text{MH}^+$ , found 315.1704.  $[\text{C}_{15}\text{H}_{17}\text{N}_2\text{O}_3]^+$  requires 315.1703.

Methyl 1,7,7-trimethyl-5-oxo-6,7-dihydro-1*H*,5*H*-pyrazolo[1,2-*a*]pyrazole-2-carboxylate (**3g**). Prepared from **1m**. Yellow solid (77%); mp 90–93 °C;  $\nu_{\max}/\text{cm}^{-1}$  (ATR) 3089, 2977, 1730, 1685, 1590, 1443, 1367, 1327, 1271, 1230, 1190, 1169, 1120, 1095, 1065, 1051, 999, 971, 931, 889, 777, 759, 708;  $\delta_{\text{H}}$  (500 MHz;  $\text{CDCl}_3$ ;  $\text{Me}_4\text{Si}$ ) 1.11 (s, 3H), 1.35 (s, 3H), 1.41 (d,  $J = 6.2$  Hz, 3H), 2.34 (d,  $J = 15.6$  Hz, 1H), 2.82 (d,  $J = 15.6$  Hz, 1H), 3.75 (s, 3H), 4.54 (qd,  $J = 6.2, 1.5$  Hz, 1H), 7.40 (d,  $J = 1.4$  Hz, 1H);  $\delta_{\text{C}}$  (126 MHz;  $\text{CDCl}_3$ ;  $\text{Me}_4\text{Si}$ ) 18.8, 23.2, 25.0, 49.3, 51.5, 56.3, 64.4, 117.5, 130.0, 164.6, 166.9; HRMS (ESI):  $\text{MH}^+$ , found 225.1230.  $[\text{C}_{11}\text{H}_{17}\text{N}_2\text{O}_3]^+$  requires 225.1234.

Methyl 1-ethyl-7,7-dimethyl-5-oxo-6,7-dihydro-1*H*,5*H*-pyrazolo[1,2-*a*]pyrazole-2-carboxylate (**3h**). Prepared from **1p**. Yellow resin (51%);  $\nu_{\max}/\text{cm}^{-1}$  (ATR) 2965, 1732, 1692, 1601, 1386, 1332, 1310, 1284, 1252, 1200, 1118, 1096, 1023, 963, 920, 891, 826, 754, 705;  $\delta_{\text{H}}$  (500 MHz;  $\text{CDCl}_3$ ;  $\text{Me}_4\text{Si}$ ) 0.93 (t,  $J = 7.4$  Hz, 3H), 1.06 (s, 3H), 1.32 (s, 3H), 1.59 – 1.77 (m, 2H), 2.31 (d,  $J = 15.4$  Hz, 1H), 2.81 (d,  $J = 15.5$  Hz, 1H), 3.74 (s, 3H), 4.42 (ddd,  $J = 6.0, 3.4, 1.3$  Hz, 1H), 7.45 (d,  $J = 1.3$  Hz, 1H);  $\delta_{\text{C}}$  (126 MHz;  $\text{CDCl}_3$ ;  $\text{Me}_4\text{Si}$ ) 9.0, 18.2,

24.9, 28.2, 48.8, 51.5, 61.5, 65.0, 115.2, 131.8, 164.6, 168.8; HRMS (ESI):  $MH^+$ , found 239.1388.  $[C_{12}H_{19}N_2O_3]^+$  requires 239.1390.

Methyl (1*S*\*,7*R*\*)-1-methyl-5-oxo-7-phenyl-6,7-dihydro-1*H*,5*H*-pyrazolo[1,2-*a*]pyrazole-2-carboxylate (**3i**). Prepared from **1q**. Orange resin (34%);  $\nu_{max}/cm^{-1}$  (ATR) 1691, 1598, 1449, 1403, 1371, 1336, 1300, 1263, 1208, 1164, 1099, 1062, 953, 920, 836, 757, 700, 676, 637;  $\delta_H$  (500 MHz;  $CDCl_3$ ;  $Me_4Si$ ) 1.18 (d,  $J = 6.3$  Hz, 3H), 2.90 (dd,  $J = 16.4, 6.6$  Hz, 1H), 3.00 (dd,  $J = 16.4, 12.6$  Hz, 1H), 3.75 (s, 3H), 4.25 (dd,  $J = 12.6, 6.7$  Hz, 1H), 4.30 (qd,  $J = 6.3, 1.7$  Hz, 1H), 7.35 – 7.43 (m, 3H), 7.45 (d,  $J = 1.7$  Hz, 1H), 7.47 – 7.51 (m, 2H);  $\delta_C$  (126 MHz;  $CDCl_3$ ;  $Me_4Si$ ) 20.9, 44.6, 51.5, 65.5, 71.4, 118.2, 127.7, 128.9, 129.3, 136.7, 164.3, 165.5; HRMS (ESI):  $MH^+$ , found 273.1227.  $[C_{15}H_{17}N_2O_3]^+$  requires 273.1234.

Methyl (1*S*\*,7*R*\*)-1,7-dimethyl-5-oxo-6,7-dihydro-1*H*,5*H*-pyrazolo[1,2-*a*]pyrazole-2-carboxylate (**3j**). Prepared from **1r**. Yellow resin (25%);  $\nu_{max}/cm^{-1}$  (ATR) 2974, 1693, 1599, 1446, 1405, 1381, 1335, 1308, 1221, 1183, 1152, 1103, 1076, 1049, 982, 929, 872, 785, 758, 719, 673;  $\delta_H$  (500 MHz;  $CDCl_3$ ;  $Me_4Si$ ) 1.33 (d,  $J = 6.1$  Hz, 3H), 1.49 (d,  $J = 6.3$  Hz, 3H), 2.56 – 2.68 (m, 2H), 3.24 – 3.35 (m, 1H), 3.75 (s, 3H), 4.26 (qd,  $J = 6.3, 1.7$  Hz, 1H), 7.36 (d,  $J = 1.6$  Hz, 1H);  $\delta_C$  (126 MHz;  $CDCl_3$ ;  $Me_4Si$ ) 17.5, 22.0, 42.8, 51.5, 63.4, 65.0, 117.8, 129.5, 164.4, 166.6; HRMS (ESI):  $MH^+$ , found 211.1078.  $[C_{10}H_{15}N_2O_3]^+$  requires 211.1077.

(3*R*\*,5*S*\*)-6-Acetyl-3,5-dimethyl-2,3-dihydro-1*H*,5*H*-pyrazolo[1,2-*a*]pyrazol-1-one (**3k**). Prepared from **1r** and 3-butyn-2-one. Yellow solid (16%); mp 128–130 °C;  $\nu_{max}/cm^{-1}$  (ATR) 2964, 2925, 1722, 1643, 1540, 1413, 1259, 1192, 1091, 1018, 797;  $\delta_H$  (500 MHz;  $CDCl_3$ ;  $Me_4Si$ ) 1.26 (d,  $J = 6.1$  Hz, 3H), 1.39 (d,  $J = 6.3$  Hz, 3H), 2.21 (s, 3H), 2.50 – 2.62 (m, 2H), 3.15 – 3.25 (m, 1H), 4.22 (qd,  $J = 6.4, 1.5$  Hz, 1H), 7.28 (d,  $J = 1.3$  Hz, 1H);  $\delta_C$  (126 MHz;  $CDCl_3$ ;  $Me_4Si$ ) 17.5, 21.9, 26.8, 42.7, 63.5, 65.1, 127.3, 129.7, 167.6, 193.5; HRMS (ESI):  $MH^+$ , found 195.1127.  $[C_{10}H_{15}N_2O_2]^+$  requires 195.1128.

(3*R*\*,5*S*\*)-6-Benzoyl-3,5-dimethyl-2,3-dihydro-1*H*,5*H*-pyrazolo[1,2-*a*]pyrazol-1-one (**3l**). Prepared from **1r** and 1-phenyl-2-propyn-1-one. Yellow resin (11%);  $\nu_{max}/cm^{-1}$  (ATR) 2973, 1715, 1622, 1568, 1408, 1382, 1357, 1308, 1268, 1217, 1177, 1135, 1078, 1016, 979, 943, 867, 795, 750, 713, 661, 613;  $\delta_H$  (500 MHz;  $CDCl_3$ ;  $Me_4Si$ ) 1.38 (d,  $J = 6.1$  Hz, 3H), 1.56 (d,  $J = 6.3$  Hz, 3H), 2.60 – 2.73 (m, 2H), 3.33 (ddq,  $J = 12.0, 7.2, 6.1$  Hz, 1H), 4.54 (qd,  $J = 6.3, 1.5$  Hz, 1H), 7.20 (d,  $J = 1.4$  Hz, 1H), 7.46 (dd,  $J = 8.3, 7.0$  Hz, 2H), 7.53 – 7.58 (m, 1H), 7.69 – 7.74 (m, 2H);  $\delta_C$  (126 MHz;  $CDCl_3$ ;  $Me_4Si$ ) 17.6, 21.4, 42.8, 63.5, 66.5, 126.4, 128.3, 128.6, 131.0, 132.3, 138.7, 167.0, 191.0; HRMS (ESI):  $MH^+$ , found 257.1290.  $[C_{15}H_{17}N_2O_2]^+$  requires 257.1285.

### Pyrazolidin-3-ones **4** and pyrazolones **5**.

Compounds **4a–e** were prepared according to established literature procedures [15–17].

1-Phenylpyrazolidin-3-one (**4a**). The  $^1H$ -NMR data is in agreement with literature. [15]

1-(4-Chlorophenyl)pyrazolidin-3-one (**4b**). The  $^1H$ -NMR data is in agreement with literature. [15]

1-(4-Methoxyphenyl)pyrazolidin-3-one (**4c**). The  $^1H$ -NMR data is in agreement with literature. [16]

5-Methyl-1-phenylpyrazolidin-3-one (**4d**). The  $^1H$ -NMR data is in agreement with literature. [15]

1,5-Diphenylpyrazolidin-3-one (**4e**). The  $^1H$ -NMR data is in agreement with literature. [17]

1-Phenyl-2*H*-pyrazolin-3-one (**5a**). Prepared from **1s** (58%). The  $^1H$ -NMR data is in agreement with literature. [18]

1-(4-Chlorophenyl)-2*H*-pyrazolin-3-one (**5b**). Prepared from **1t** (63%). The  $^1H$ -NMR data is in agreement with literature. [19]



1-(4-Methoxyphenyl)-2*H*-pyrazolin-3-one (**5c**). Prepared from **1u** (84%). The characterization data is in agreement with literature. [20]

5-Methyl-1-phenyl-2*H*-pyrazolin-3-one (**5d**). Prepared from **1v** (30%). The <sup>1</sup>H-NMR data is in agreement with literature. [21]

1,5-Diphenyl-2*H*-pyrazolin-3-one (**5e**). Prepared from **1w** (20%). The <sup>1</sup>H-NMR data is in agreement with literature. [22]

5.  $^1\text{H}$  and  $^{13}\text{C}$  NMR spectra of novel compounds **1**, **2** and **3**.

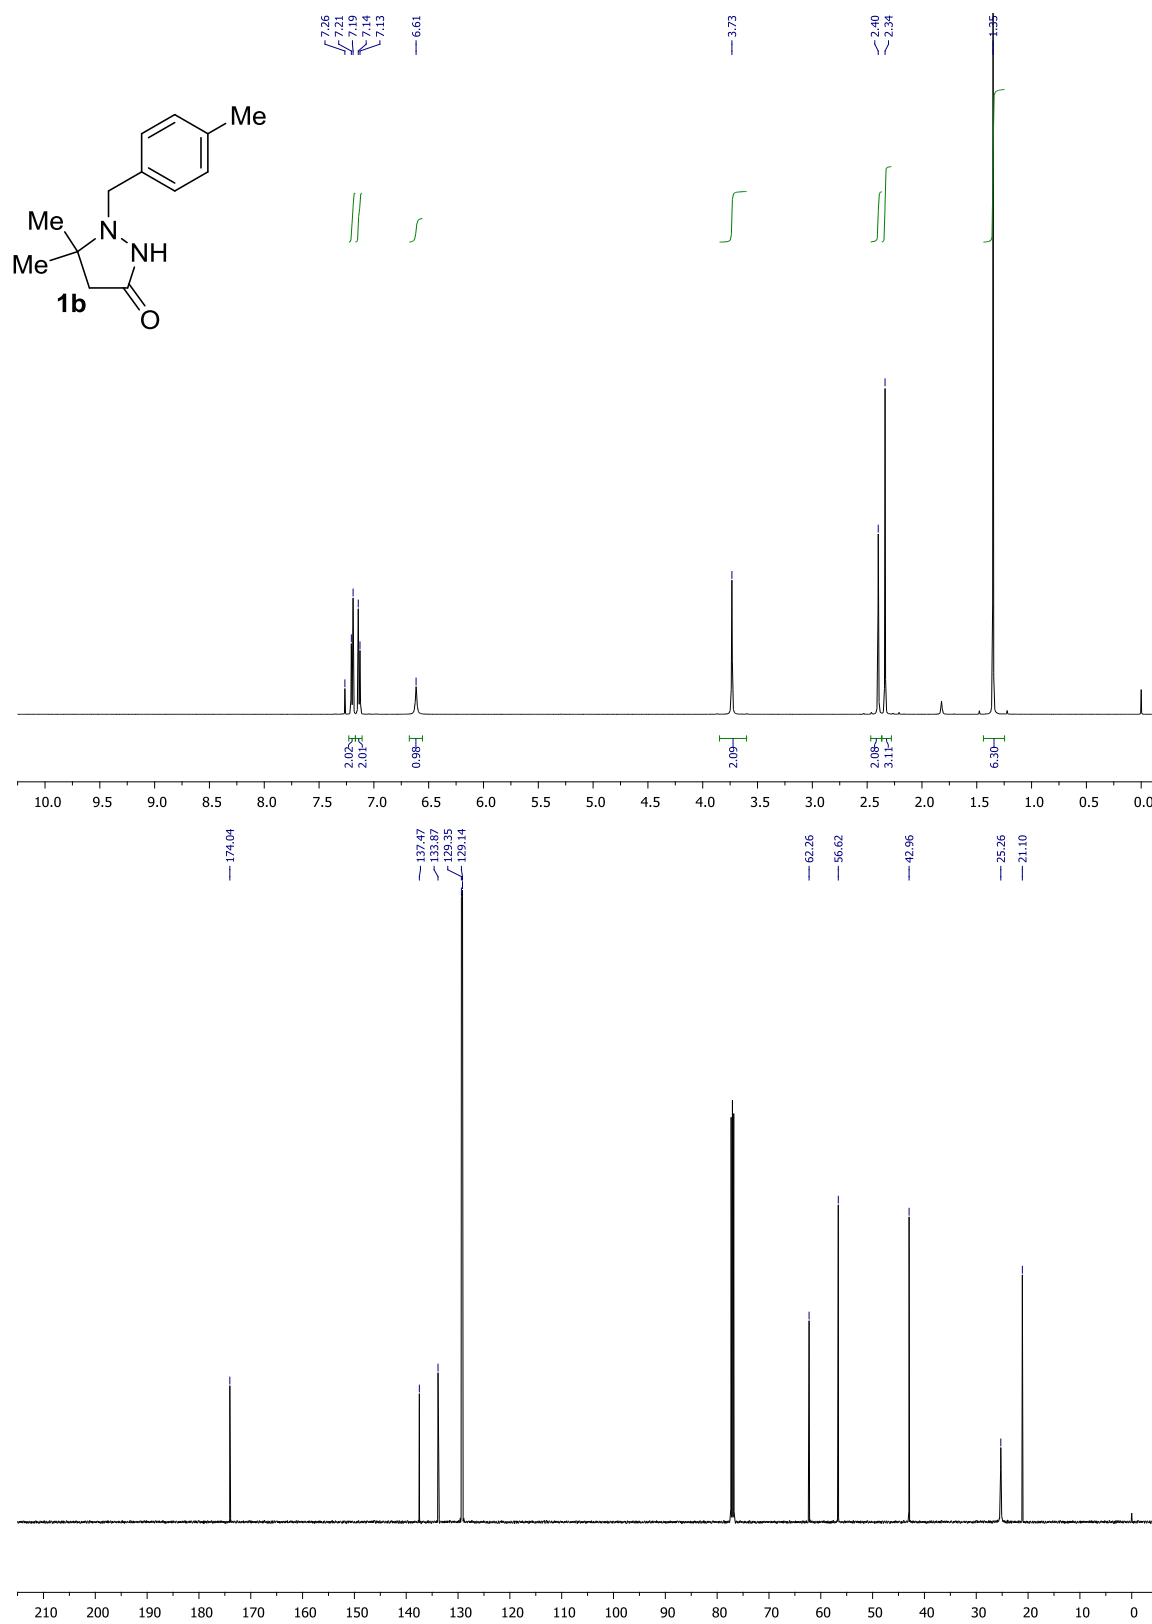

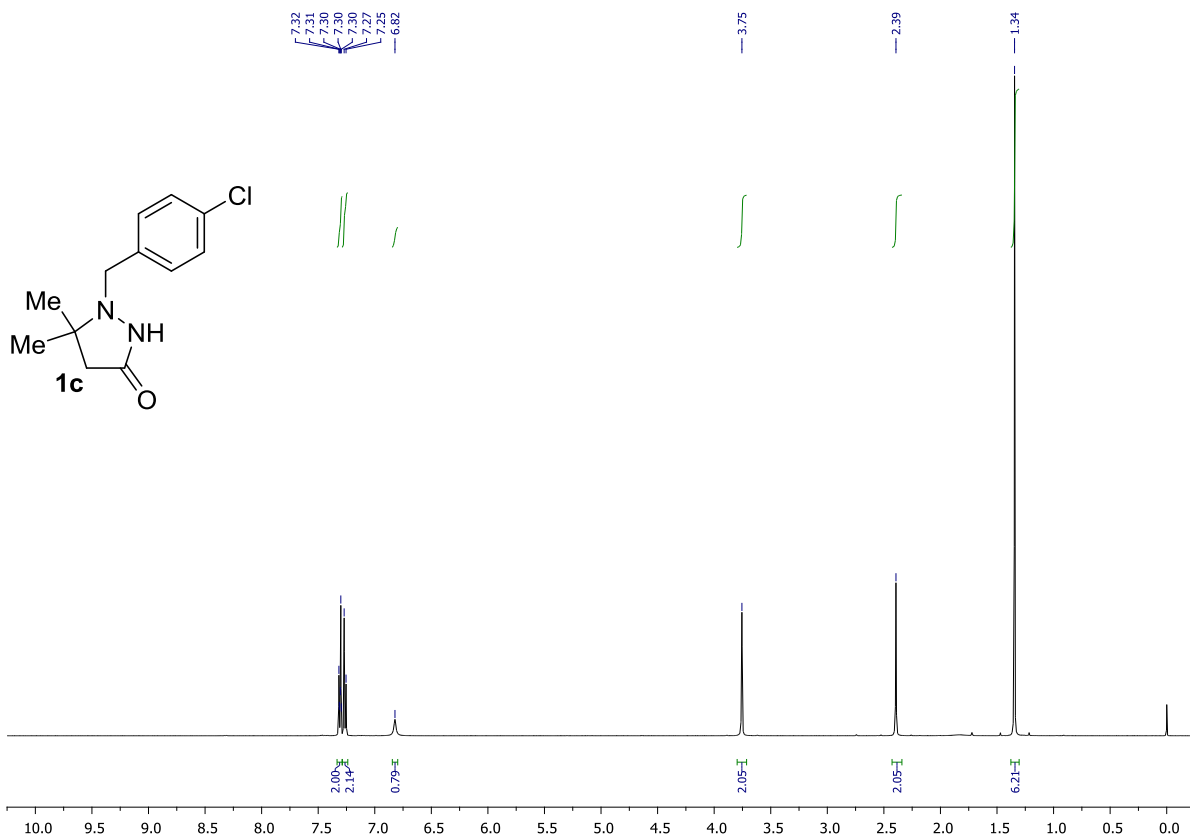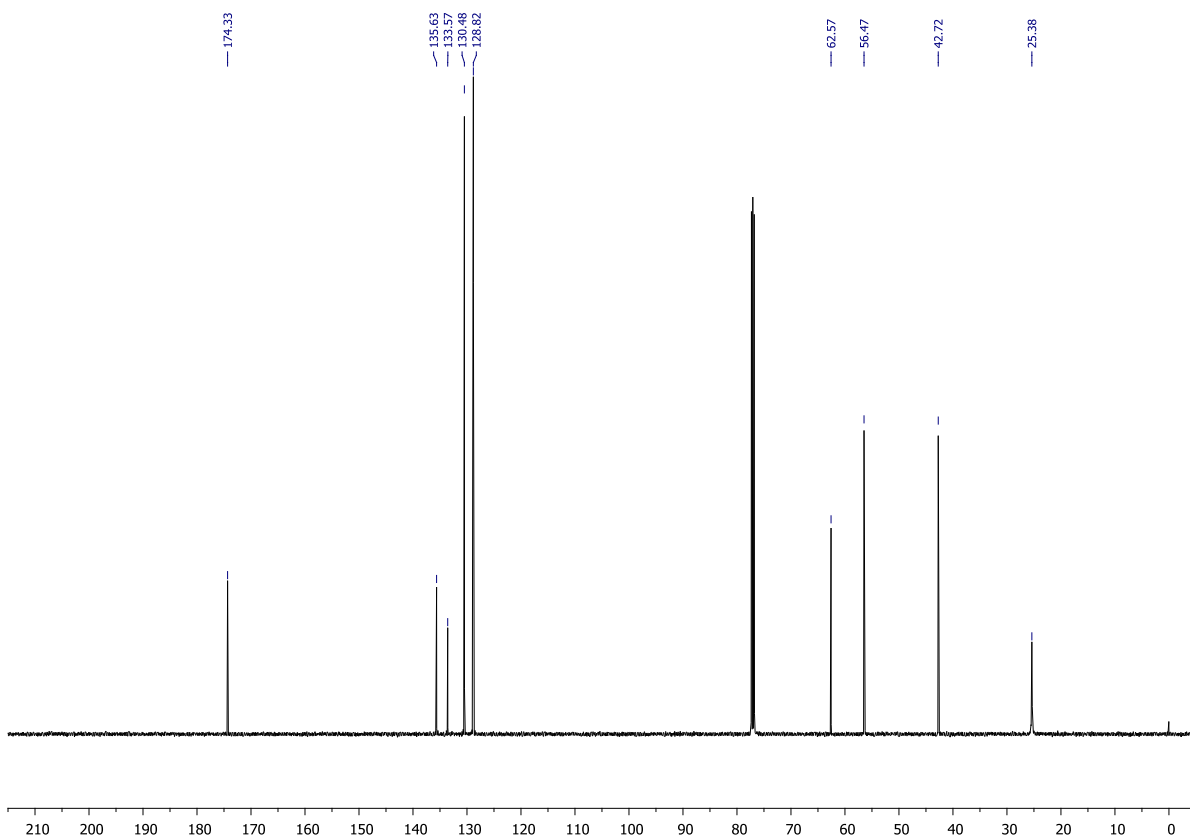

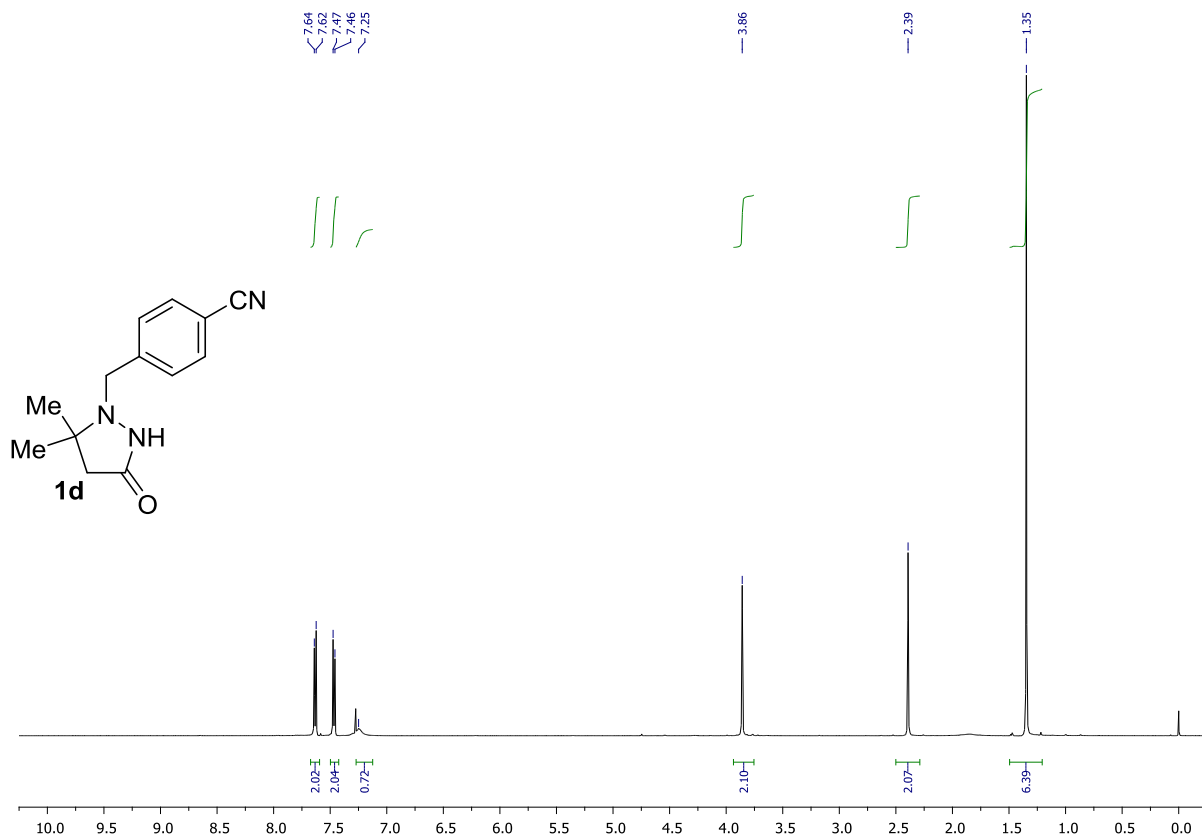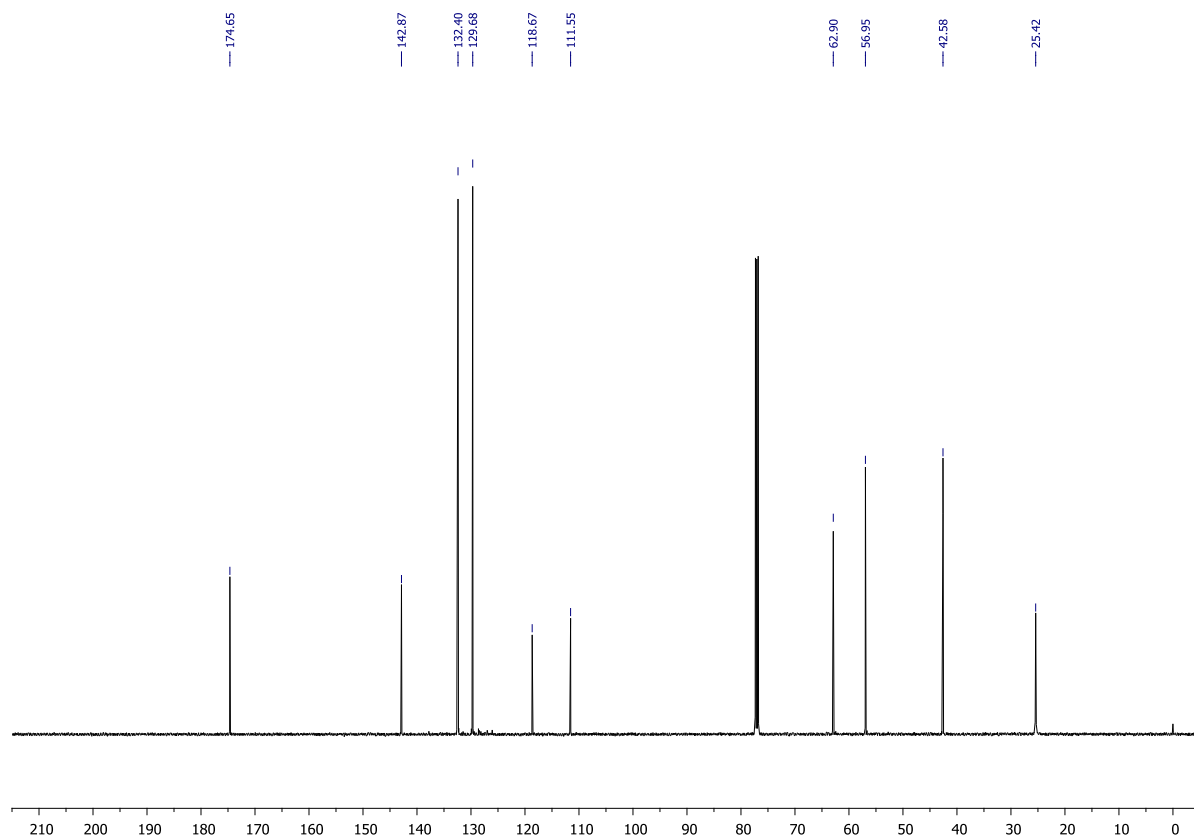

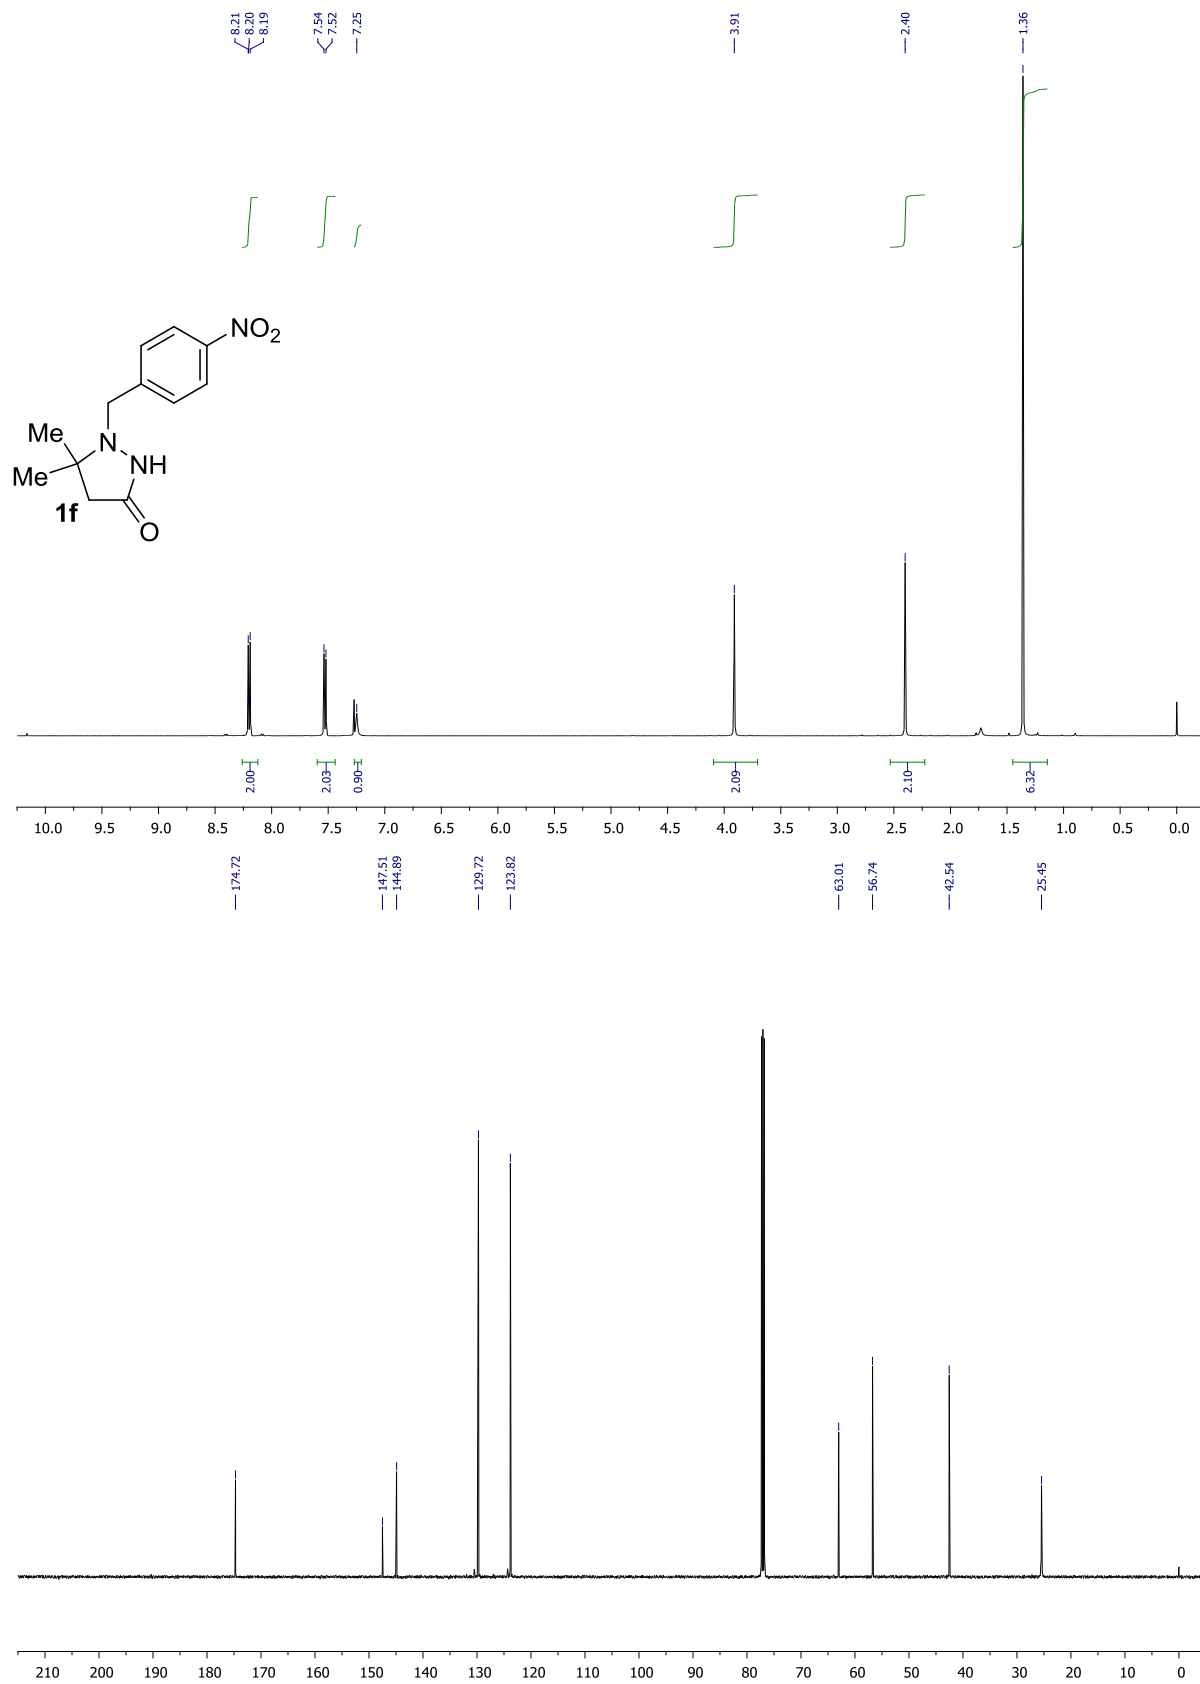

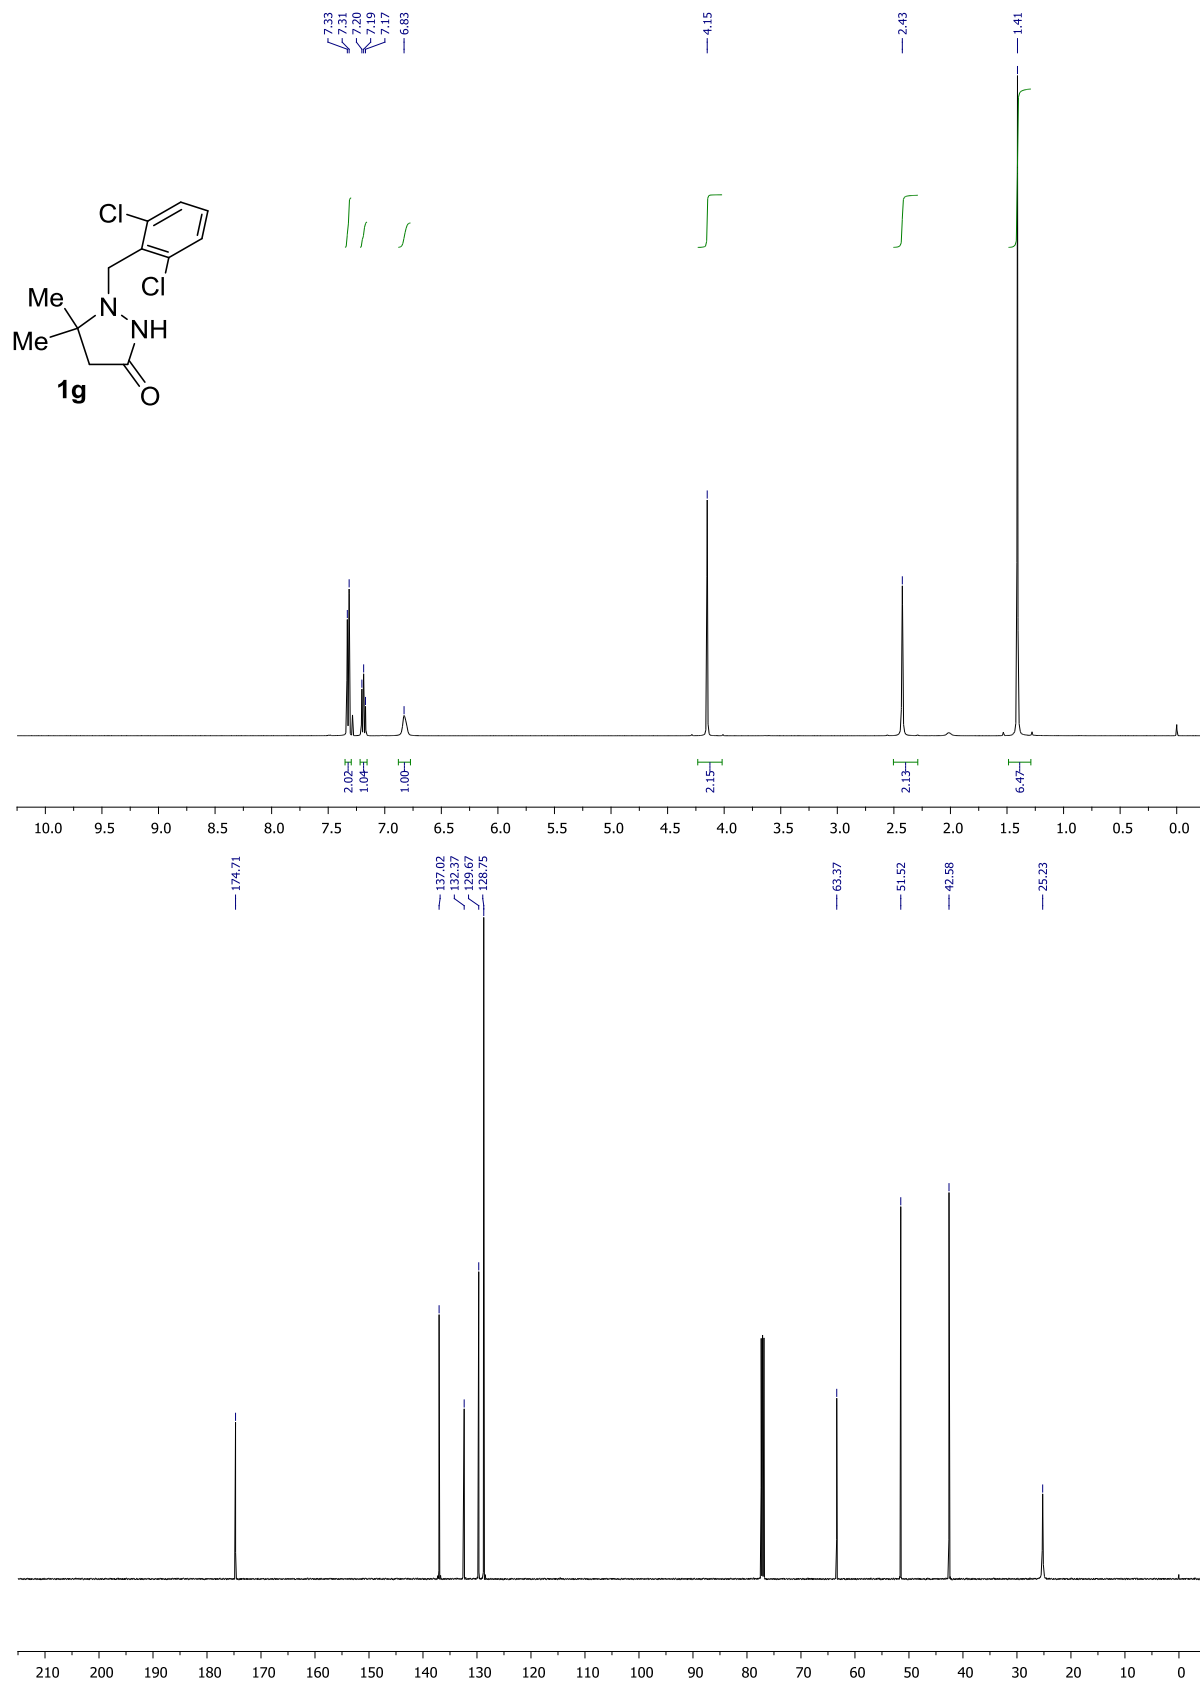

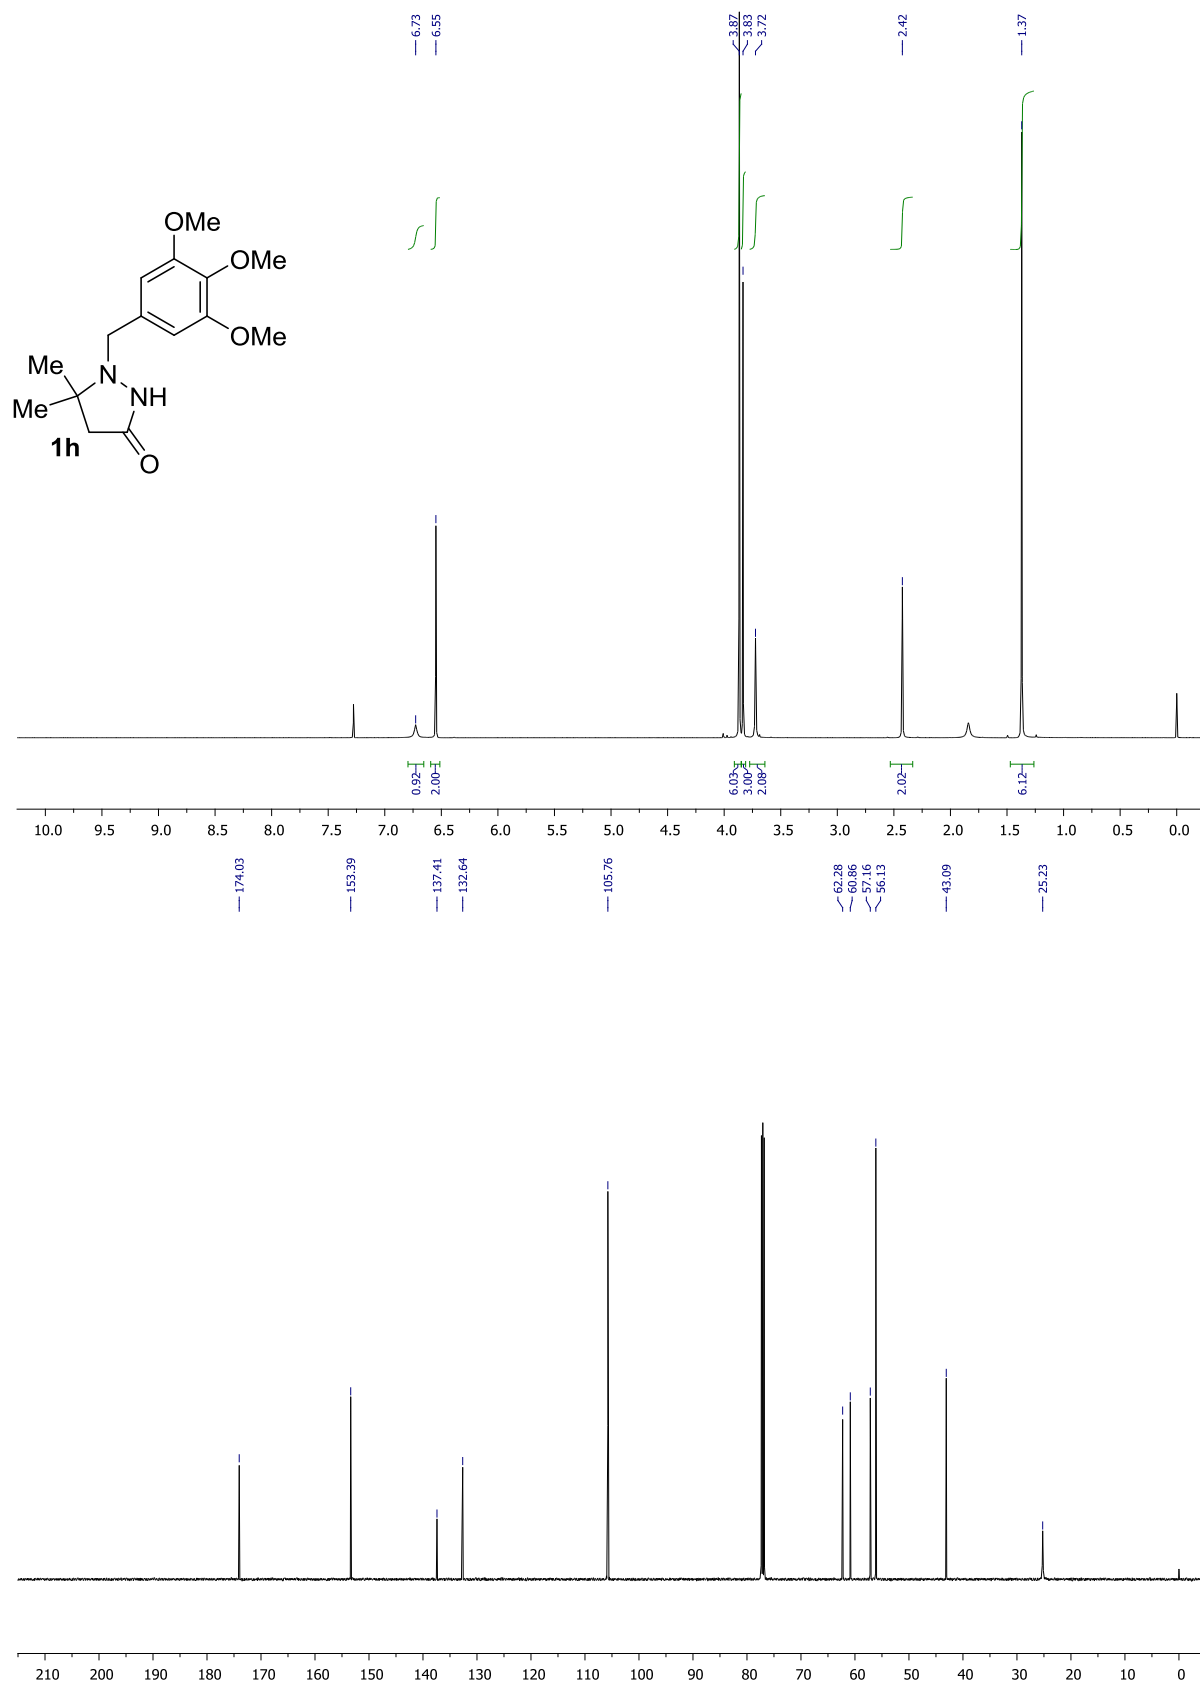

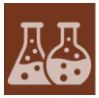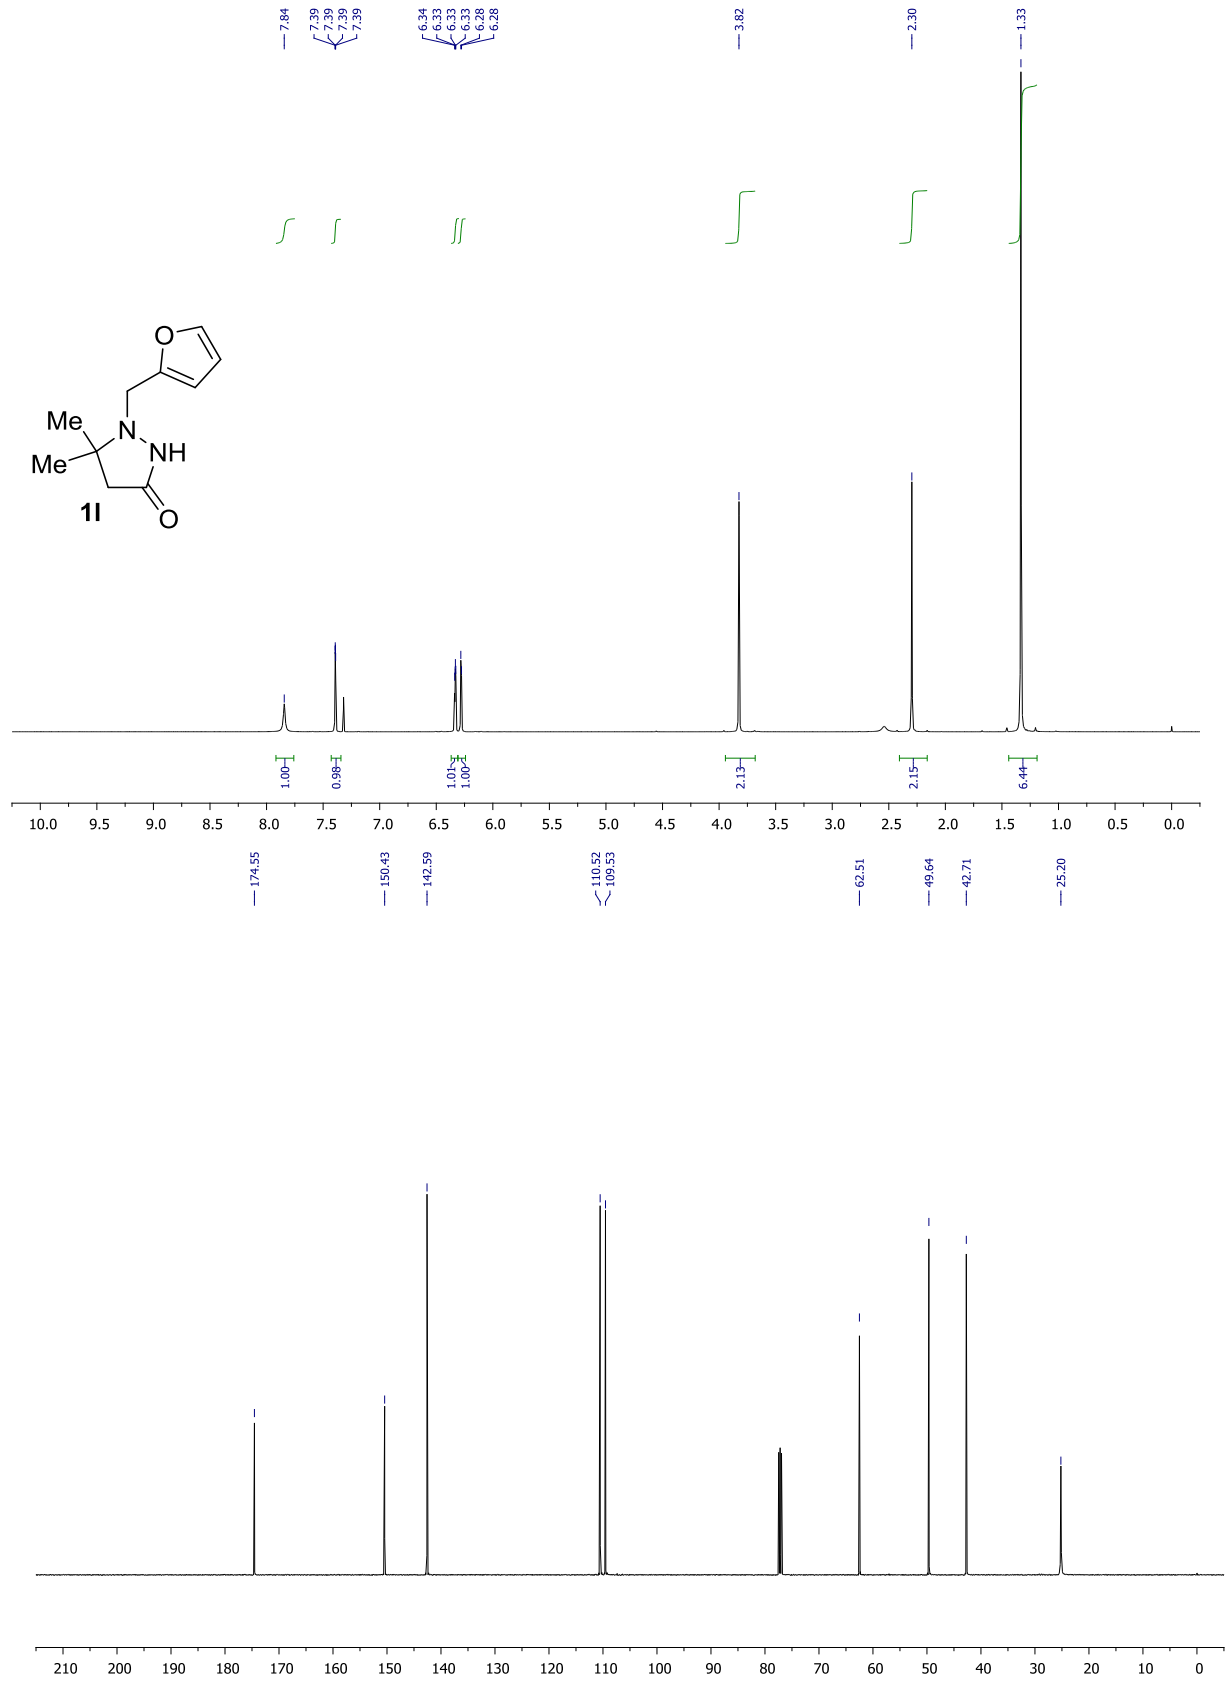



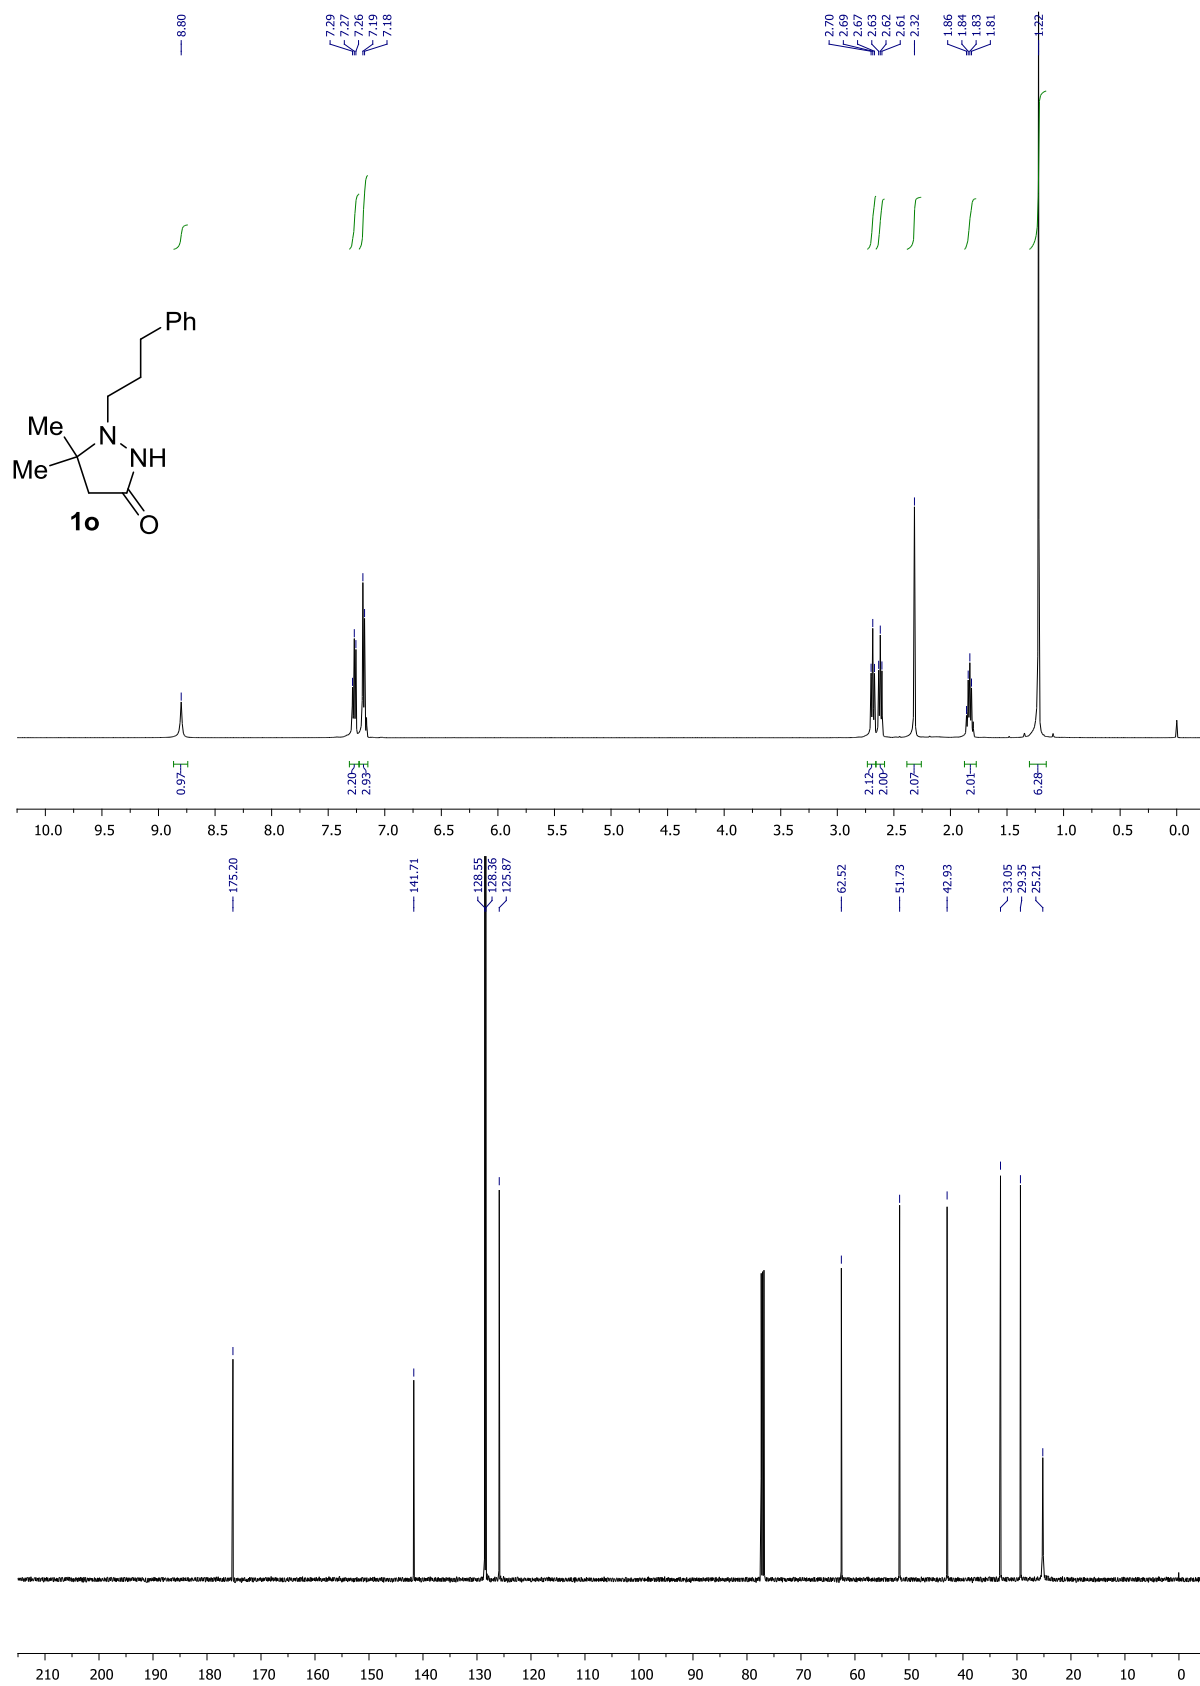

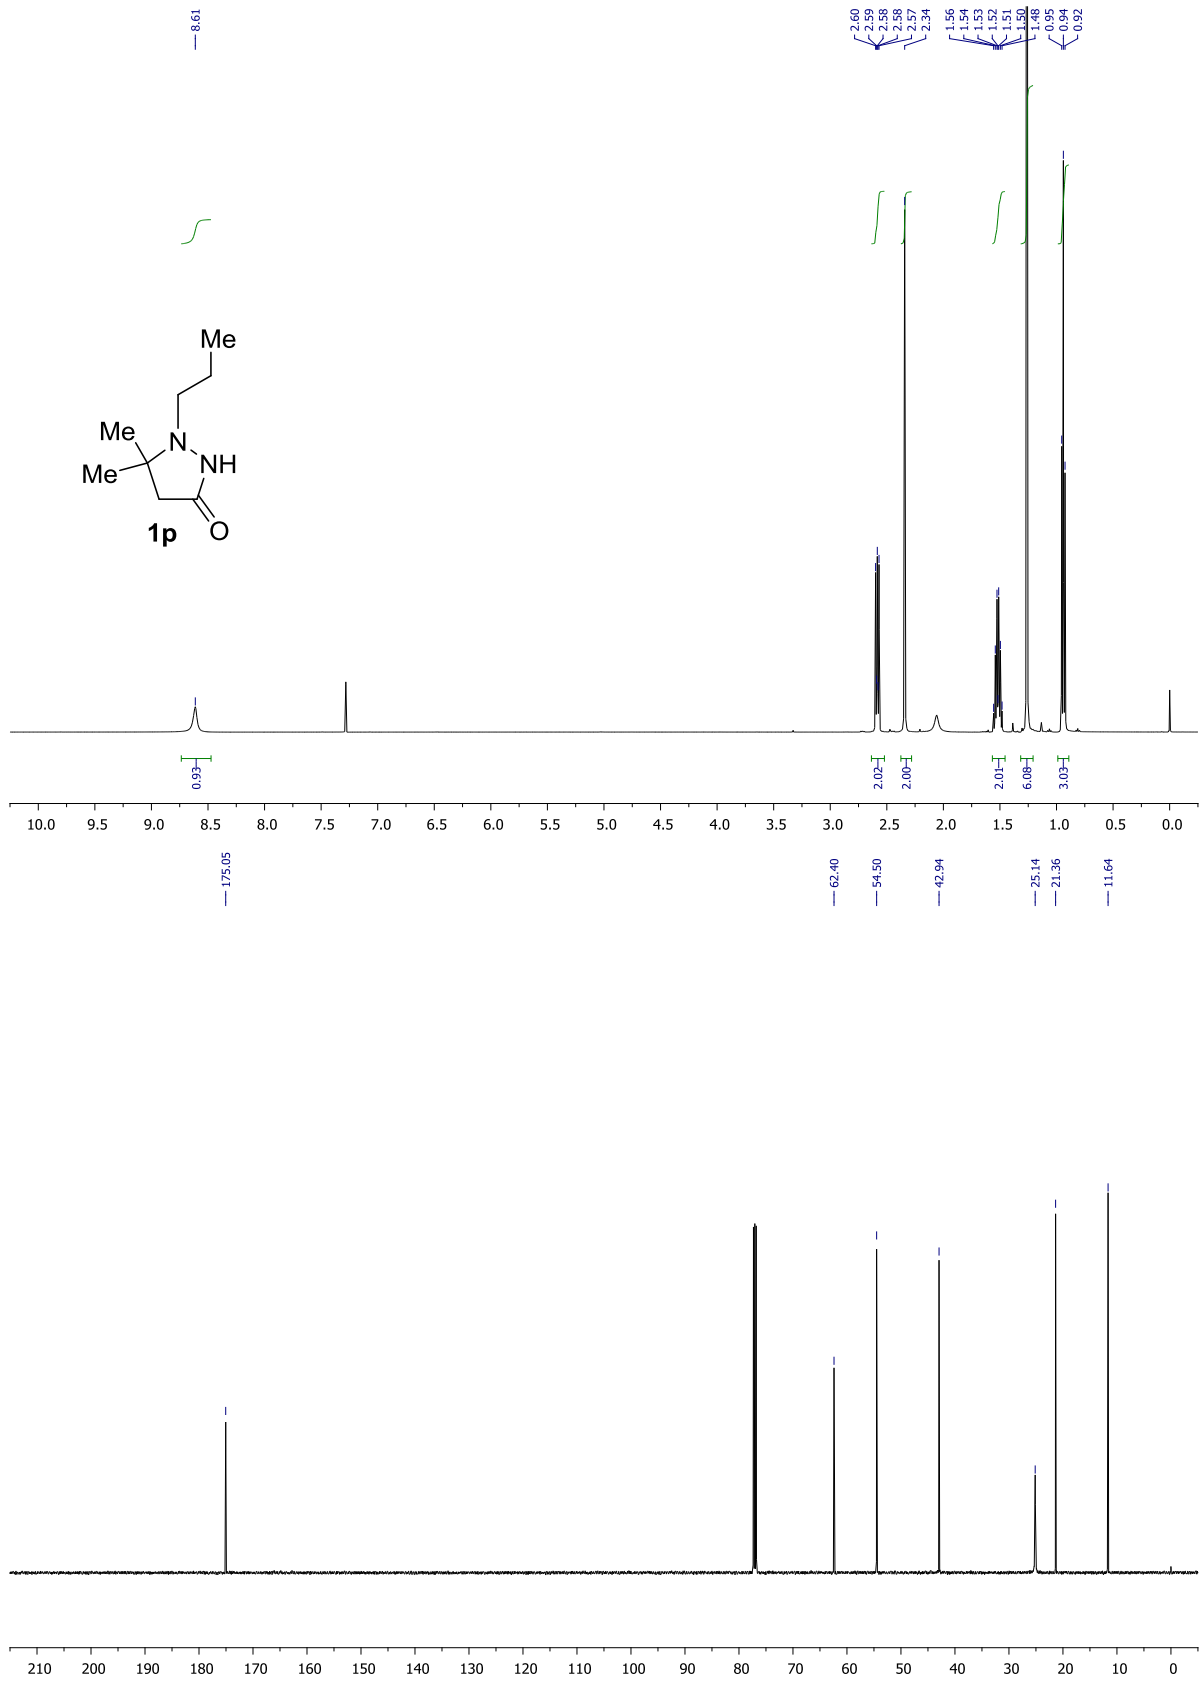

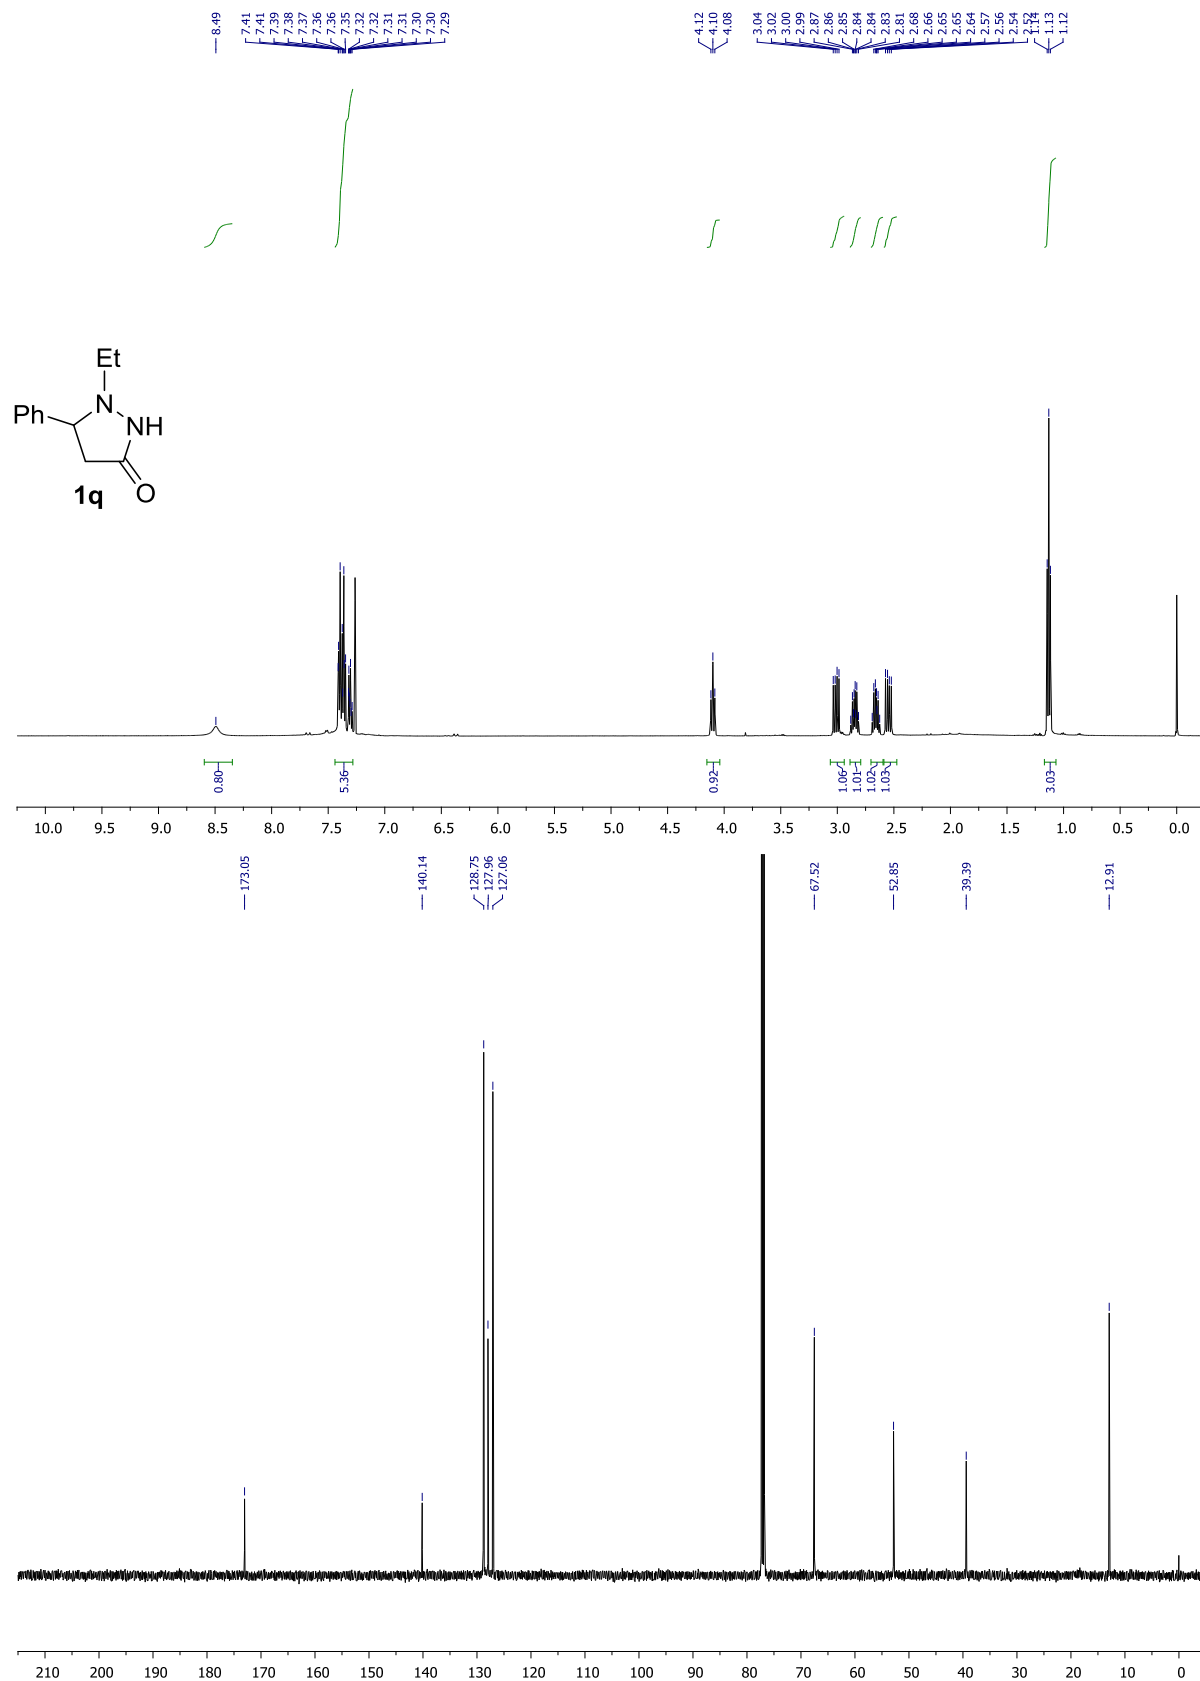

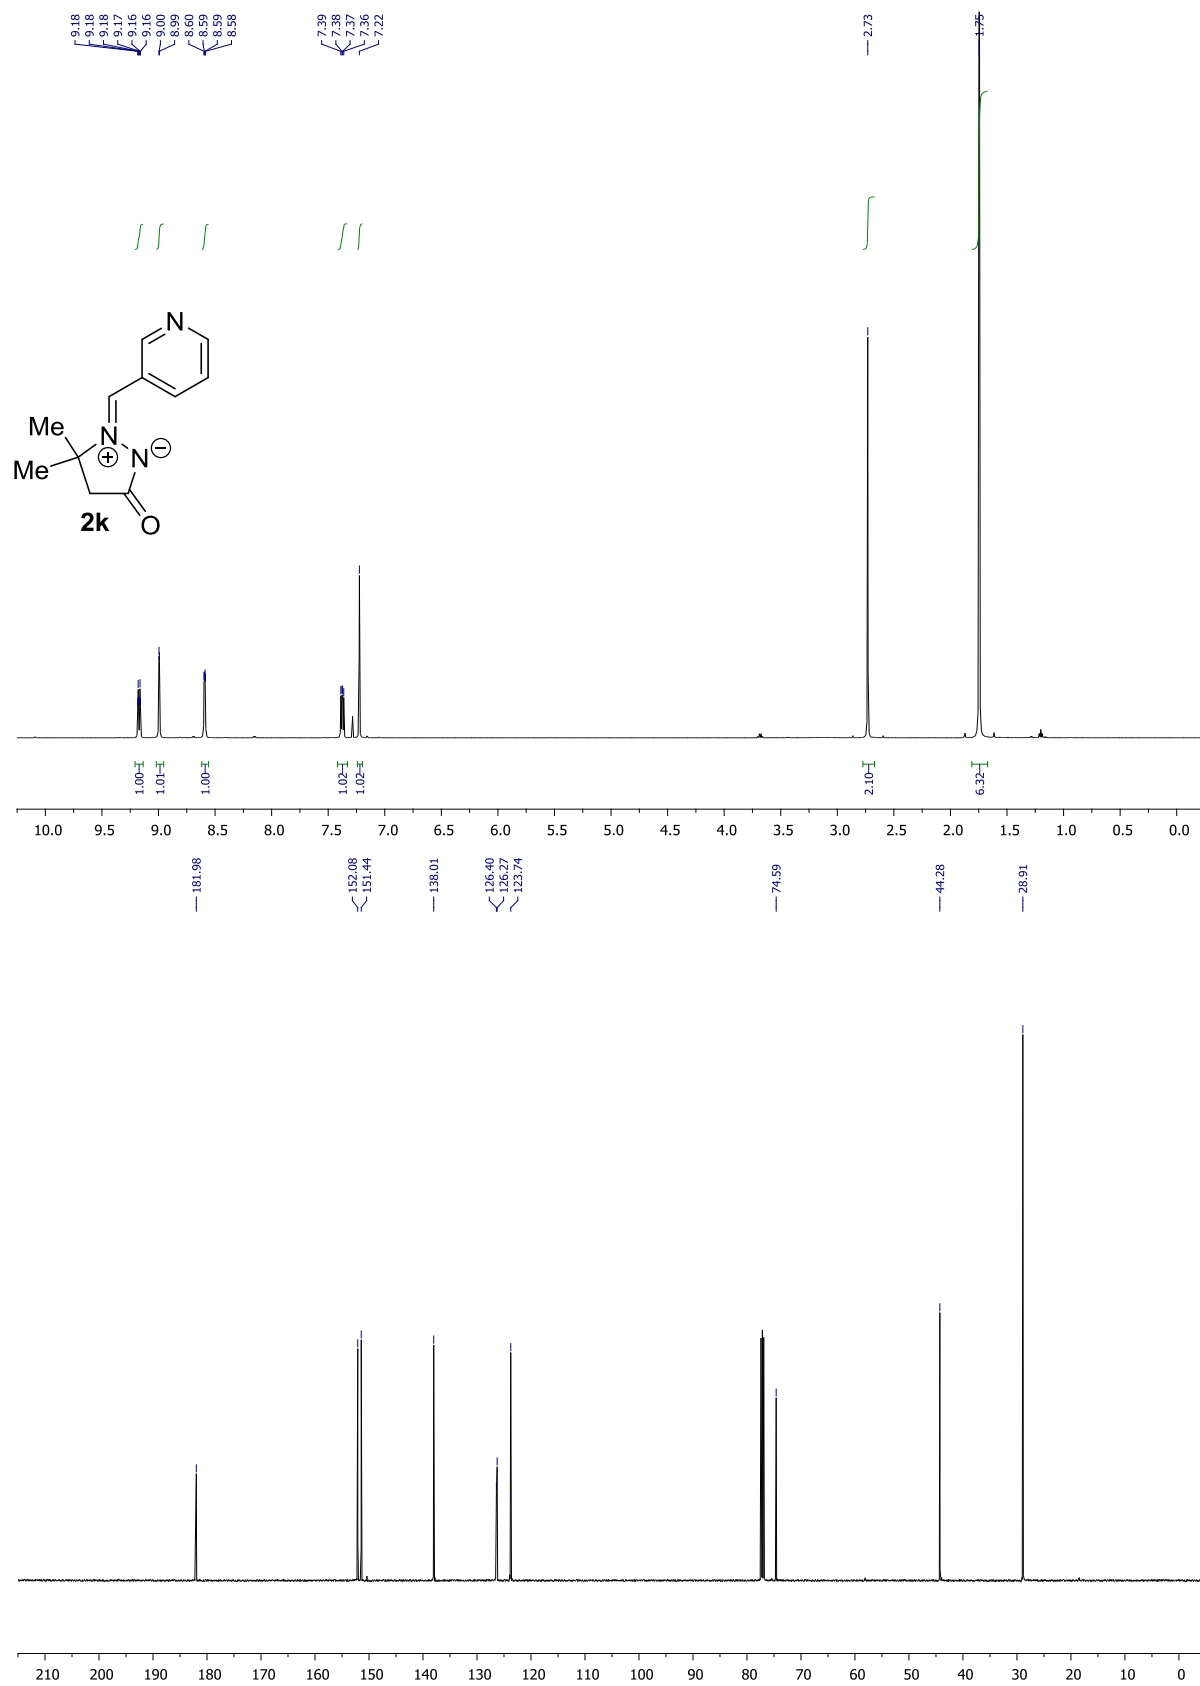

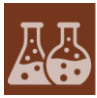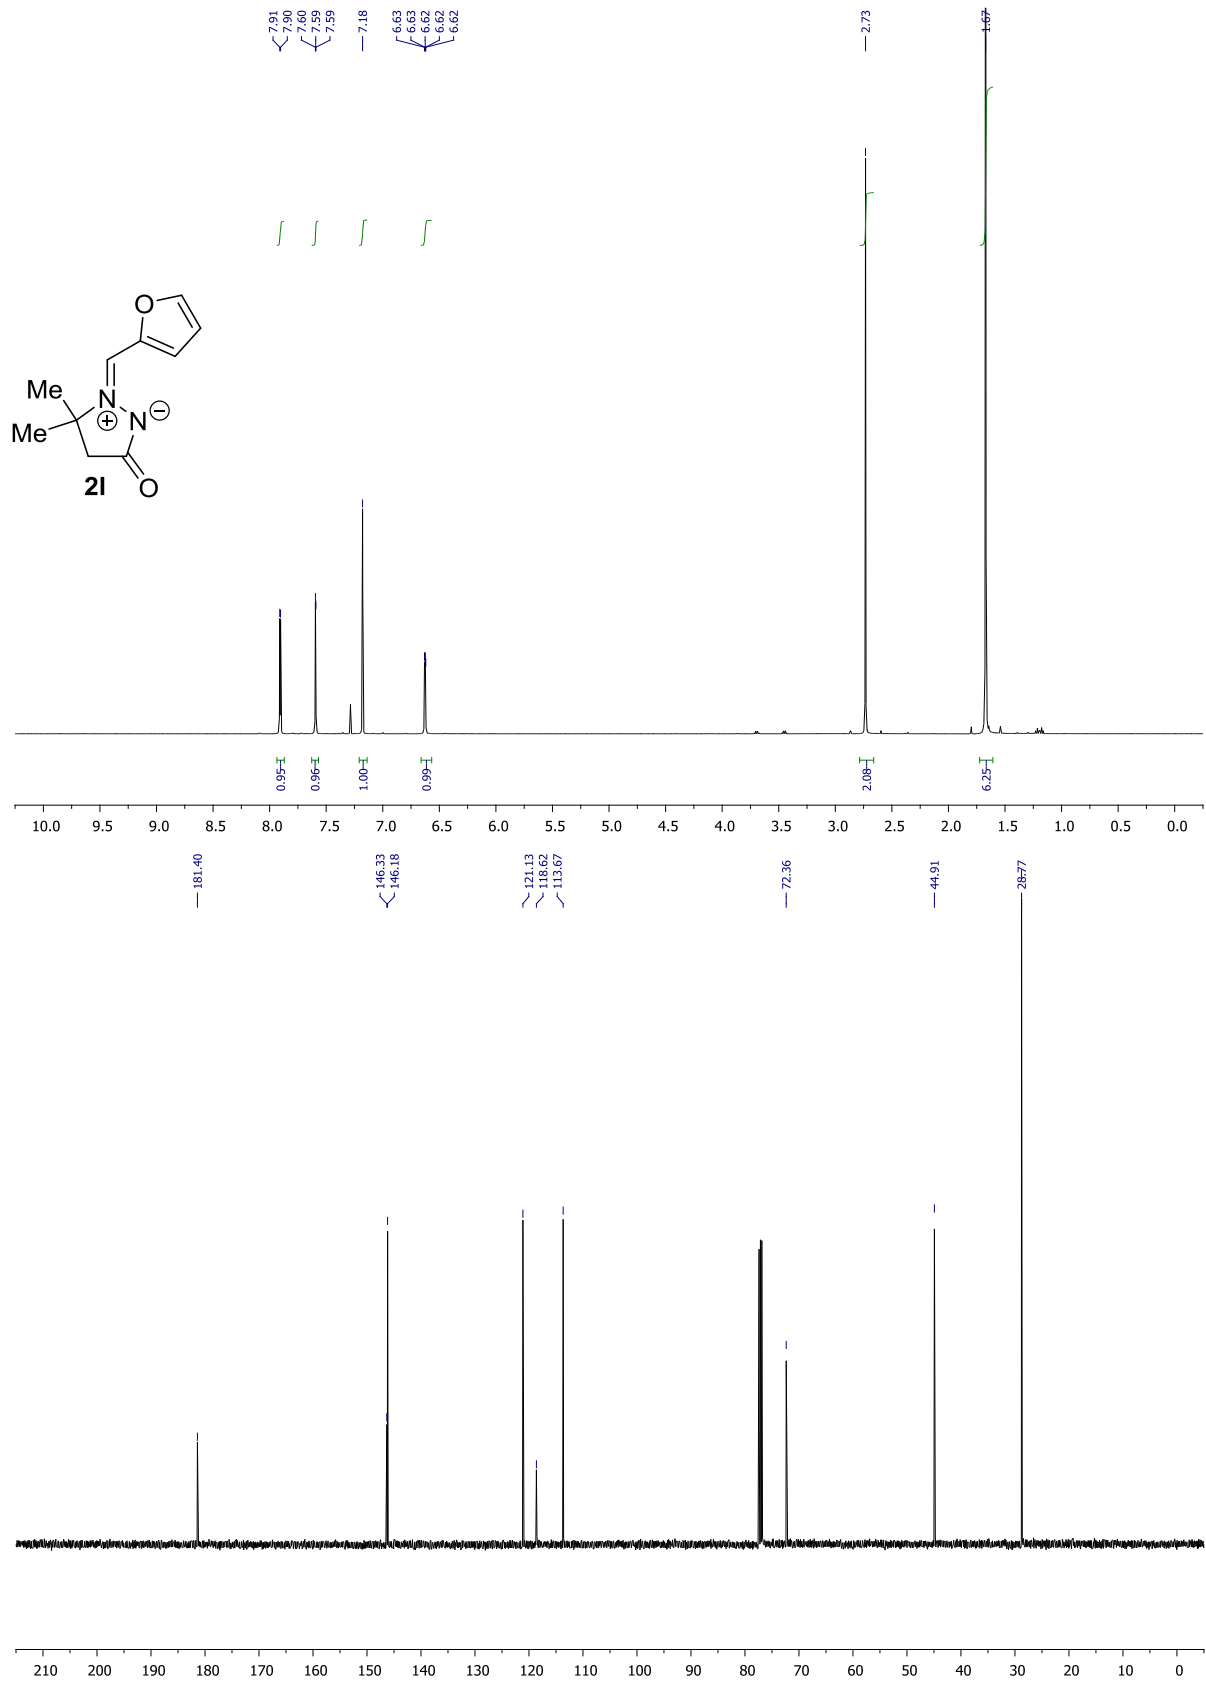

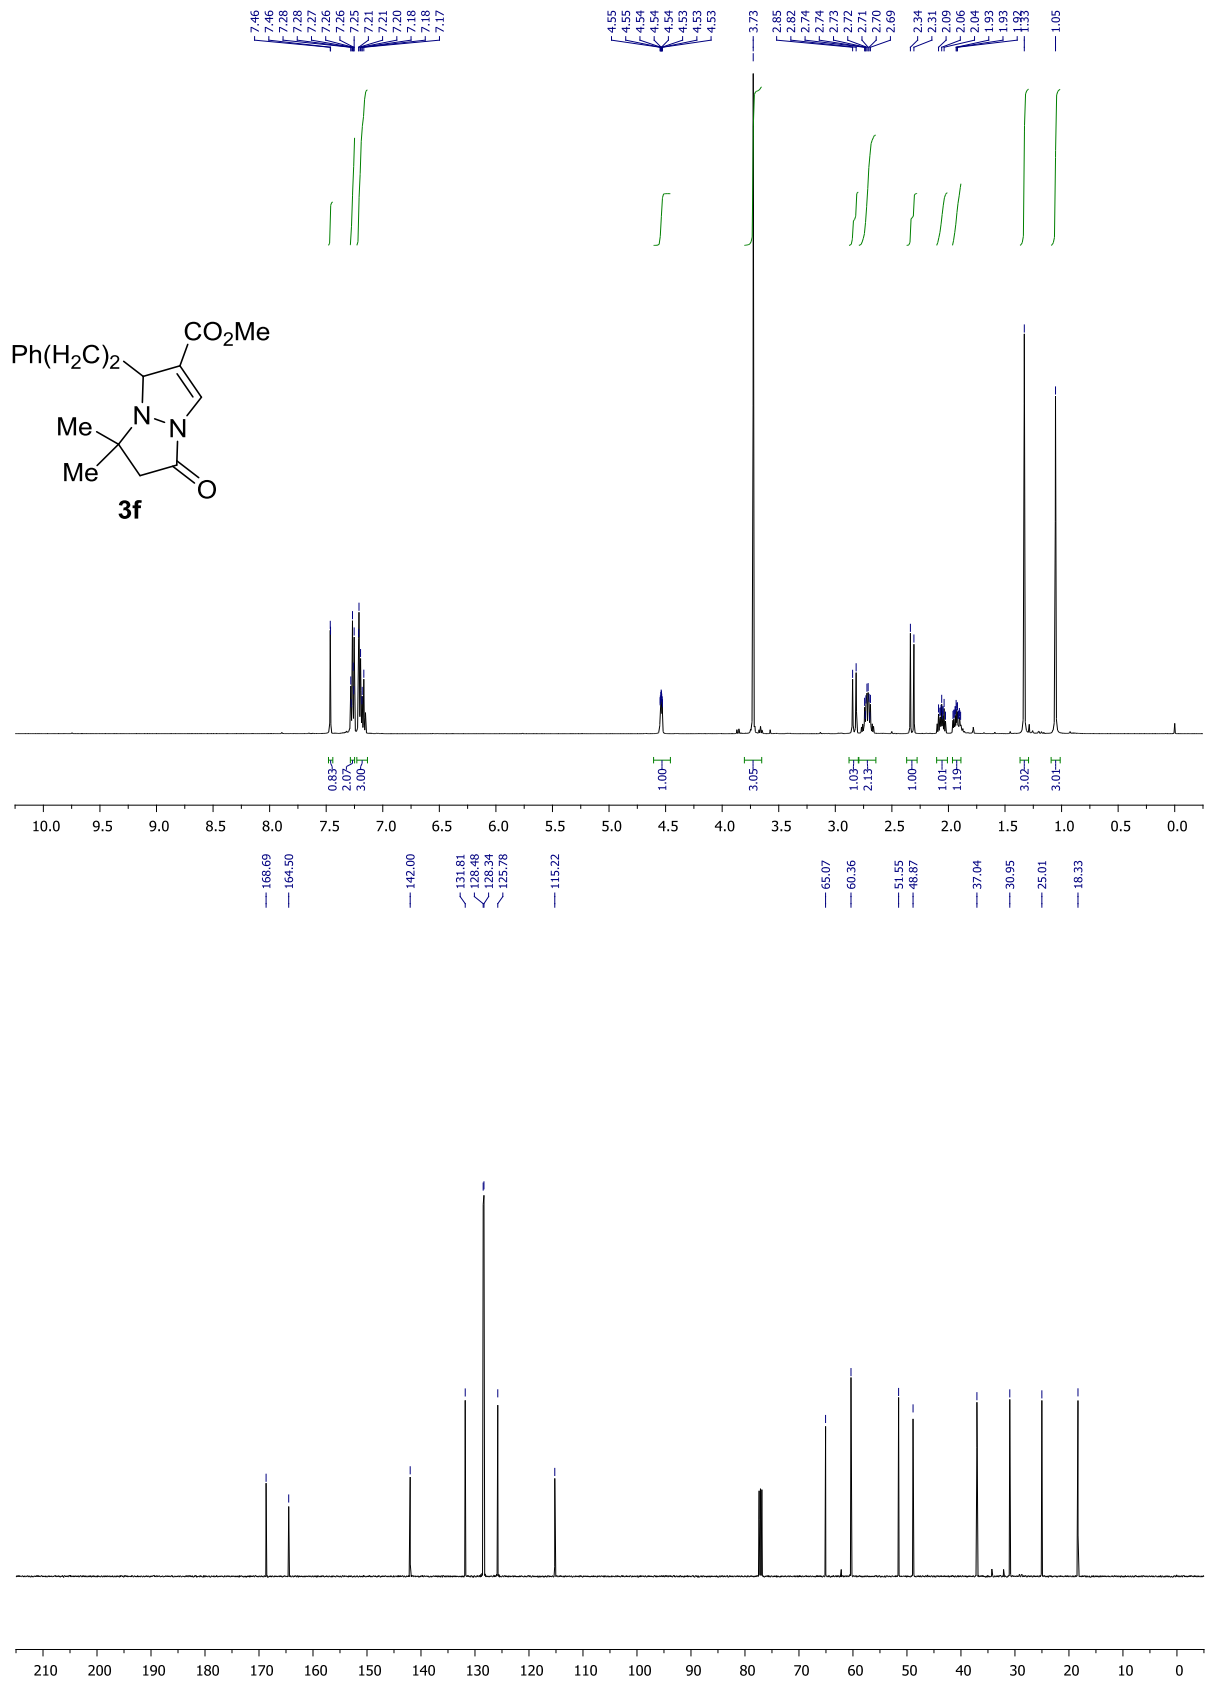

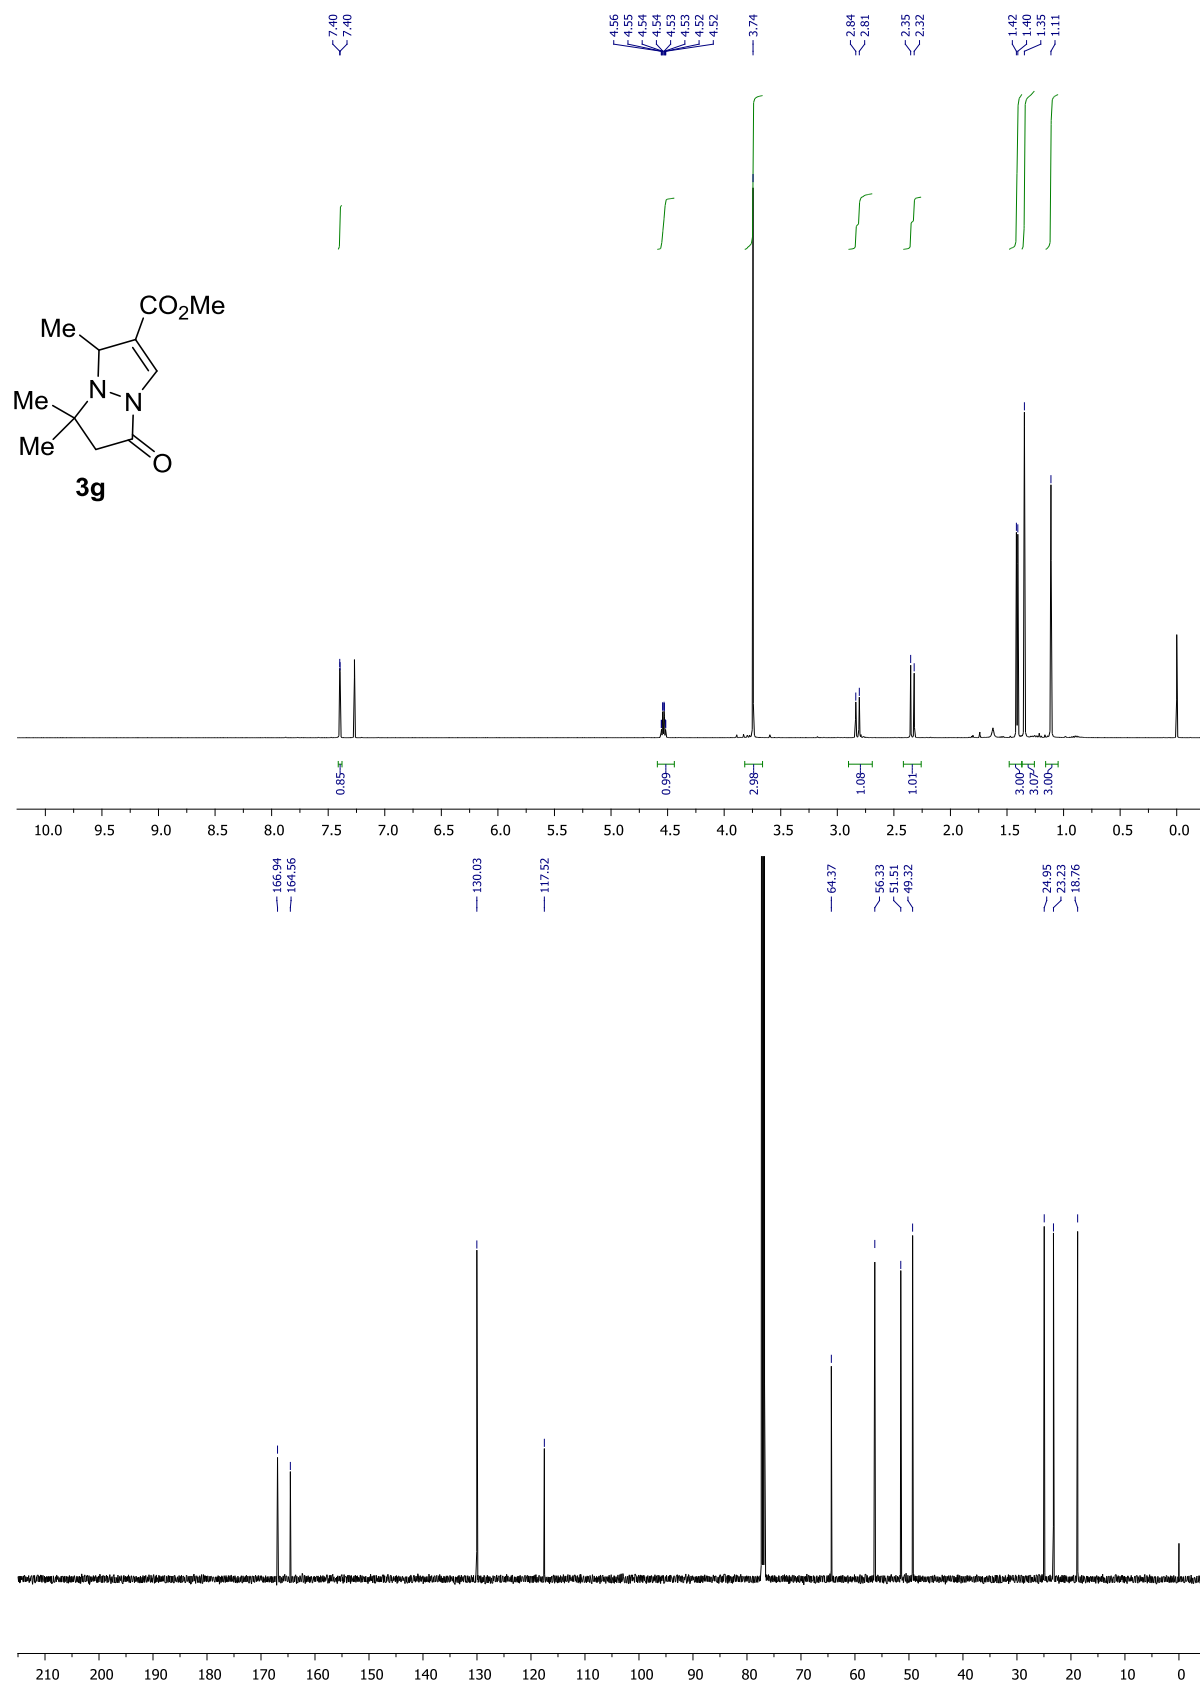

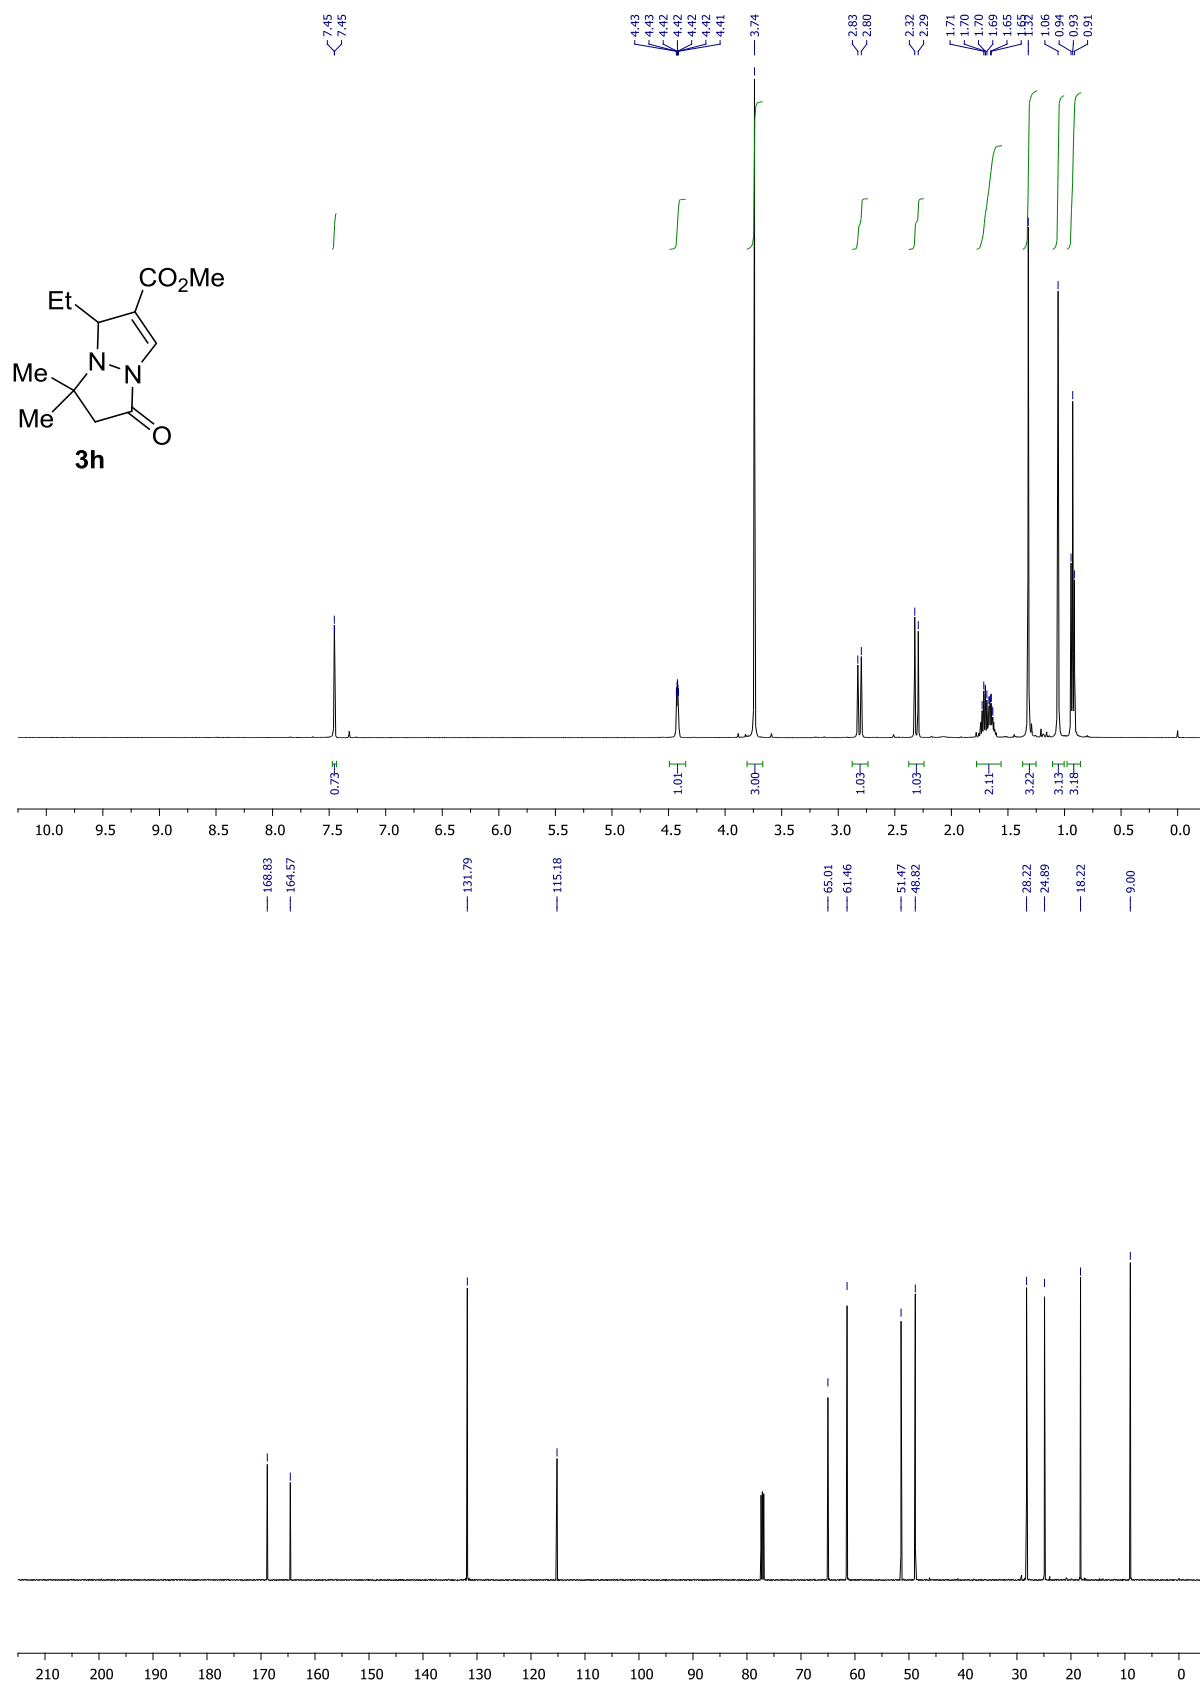



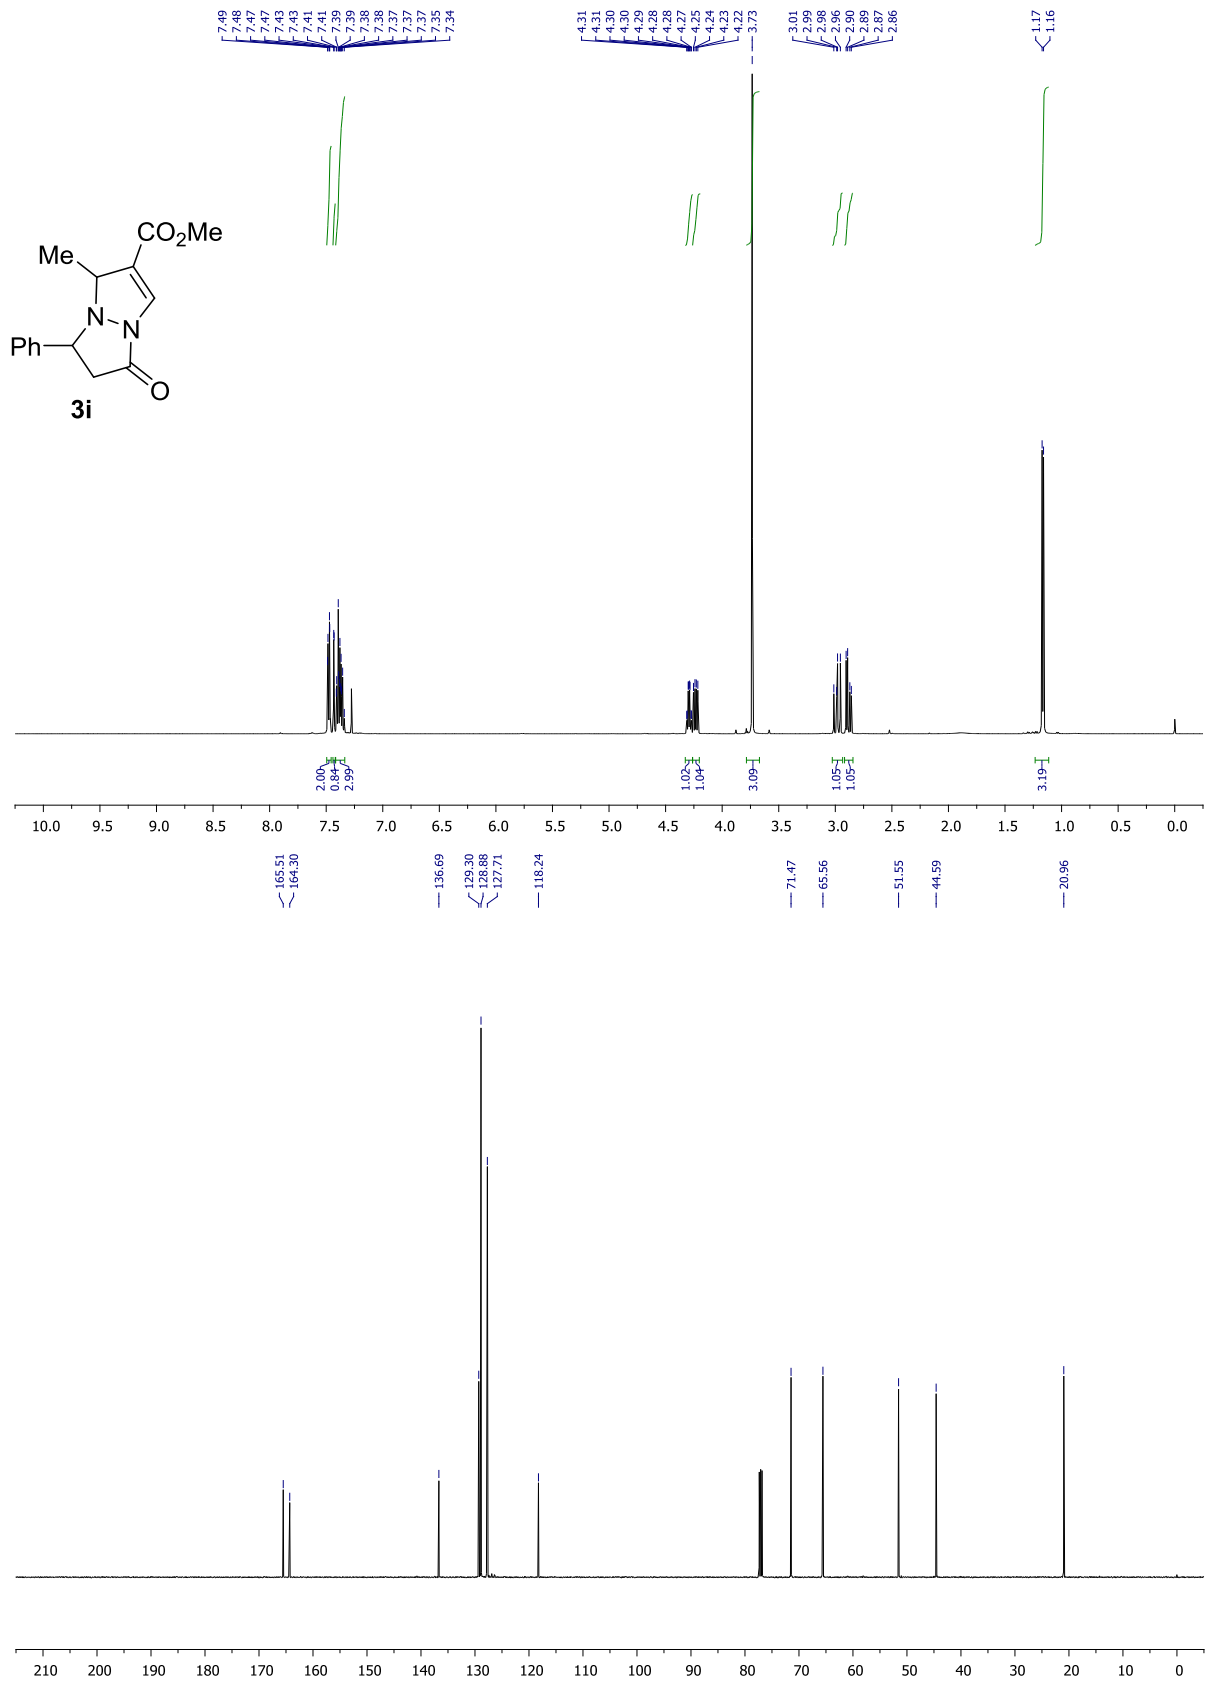

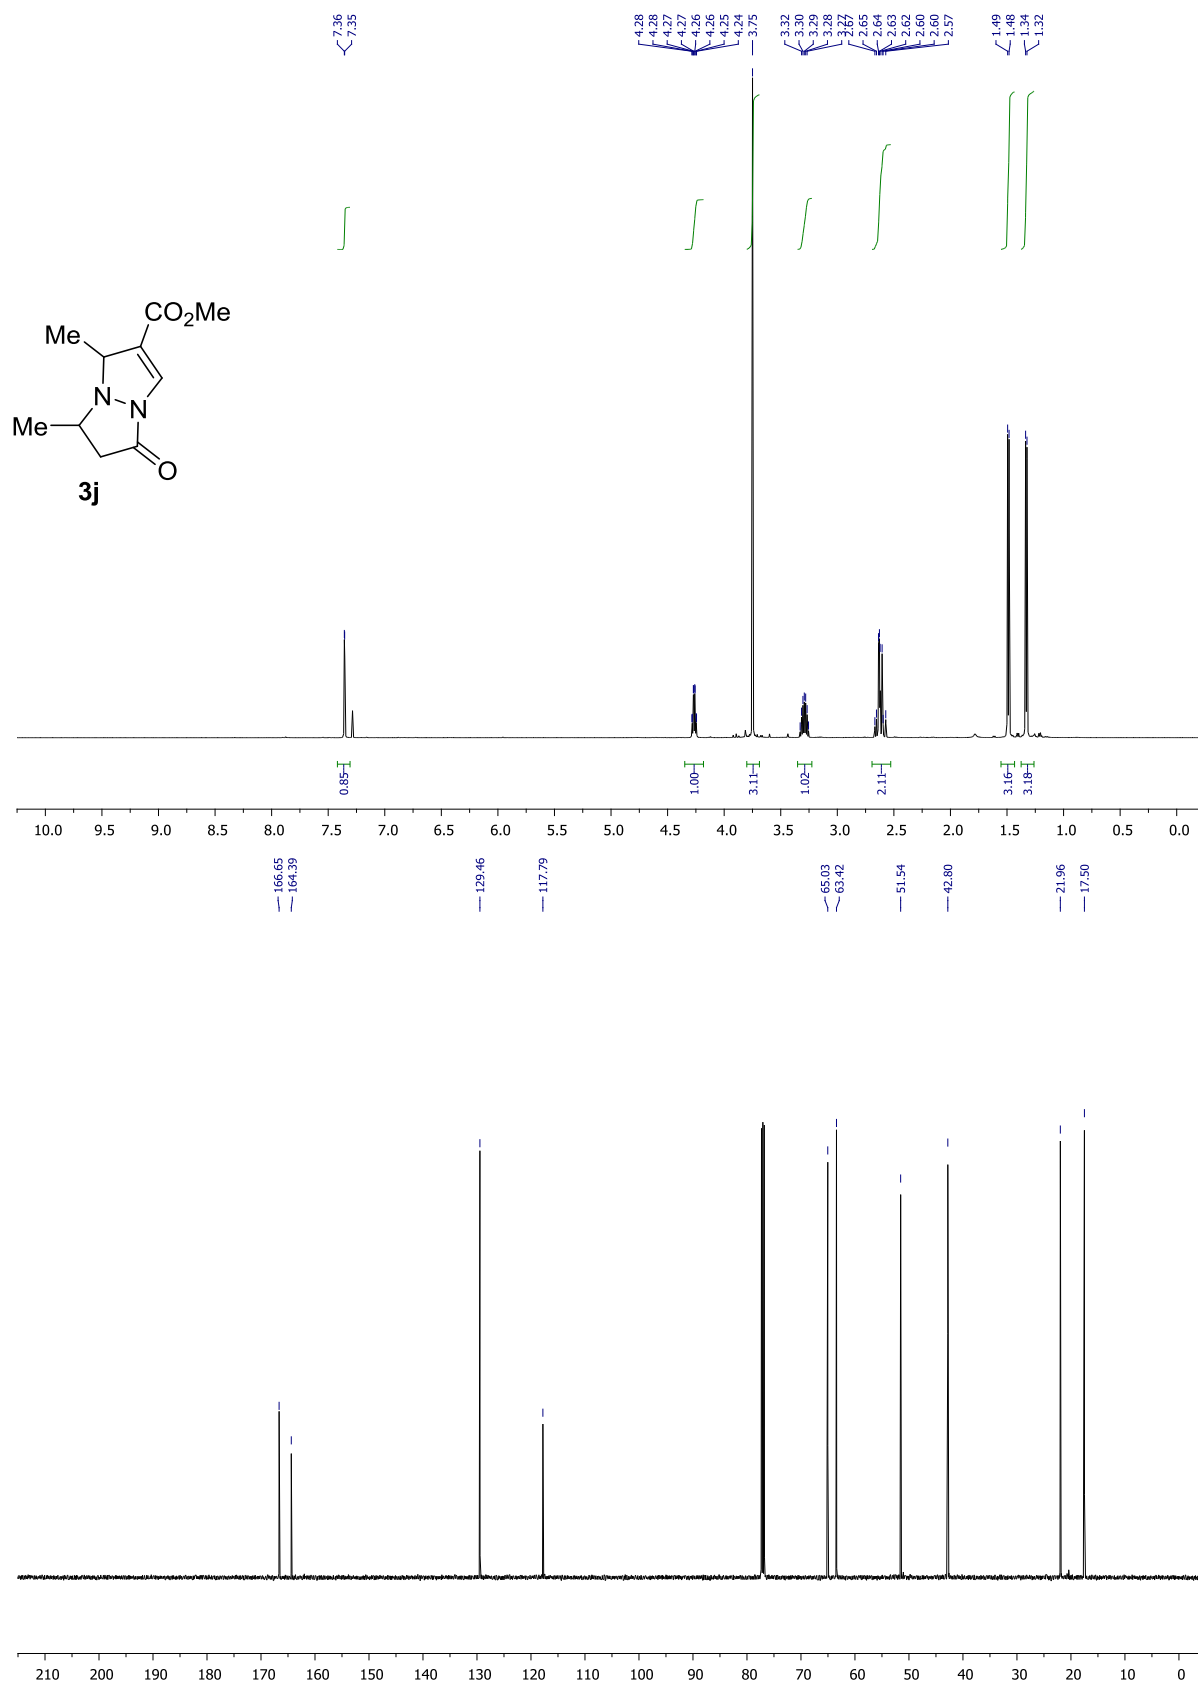

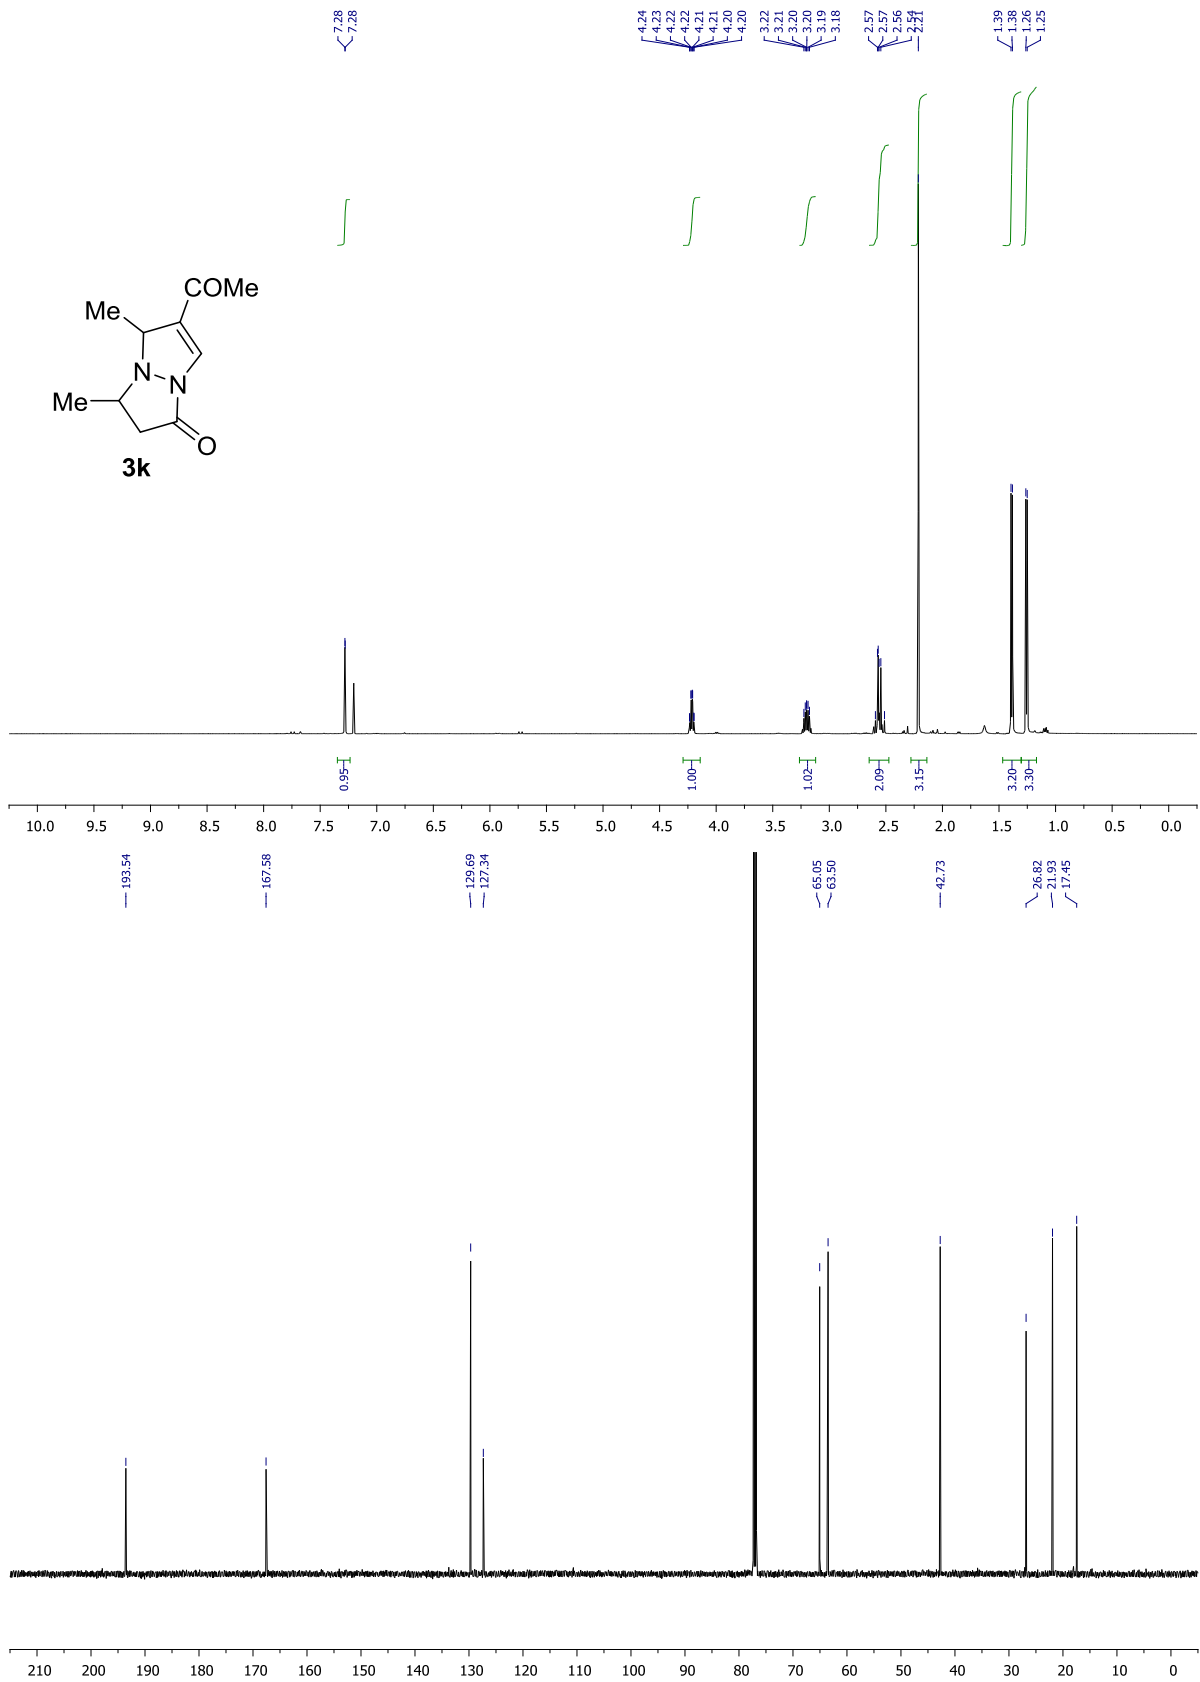

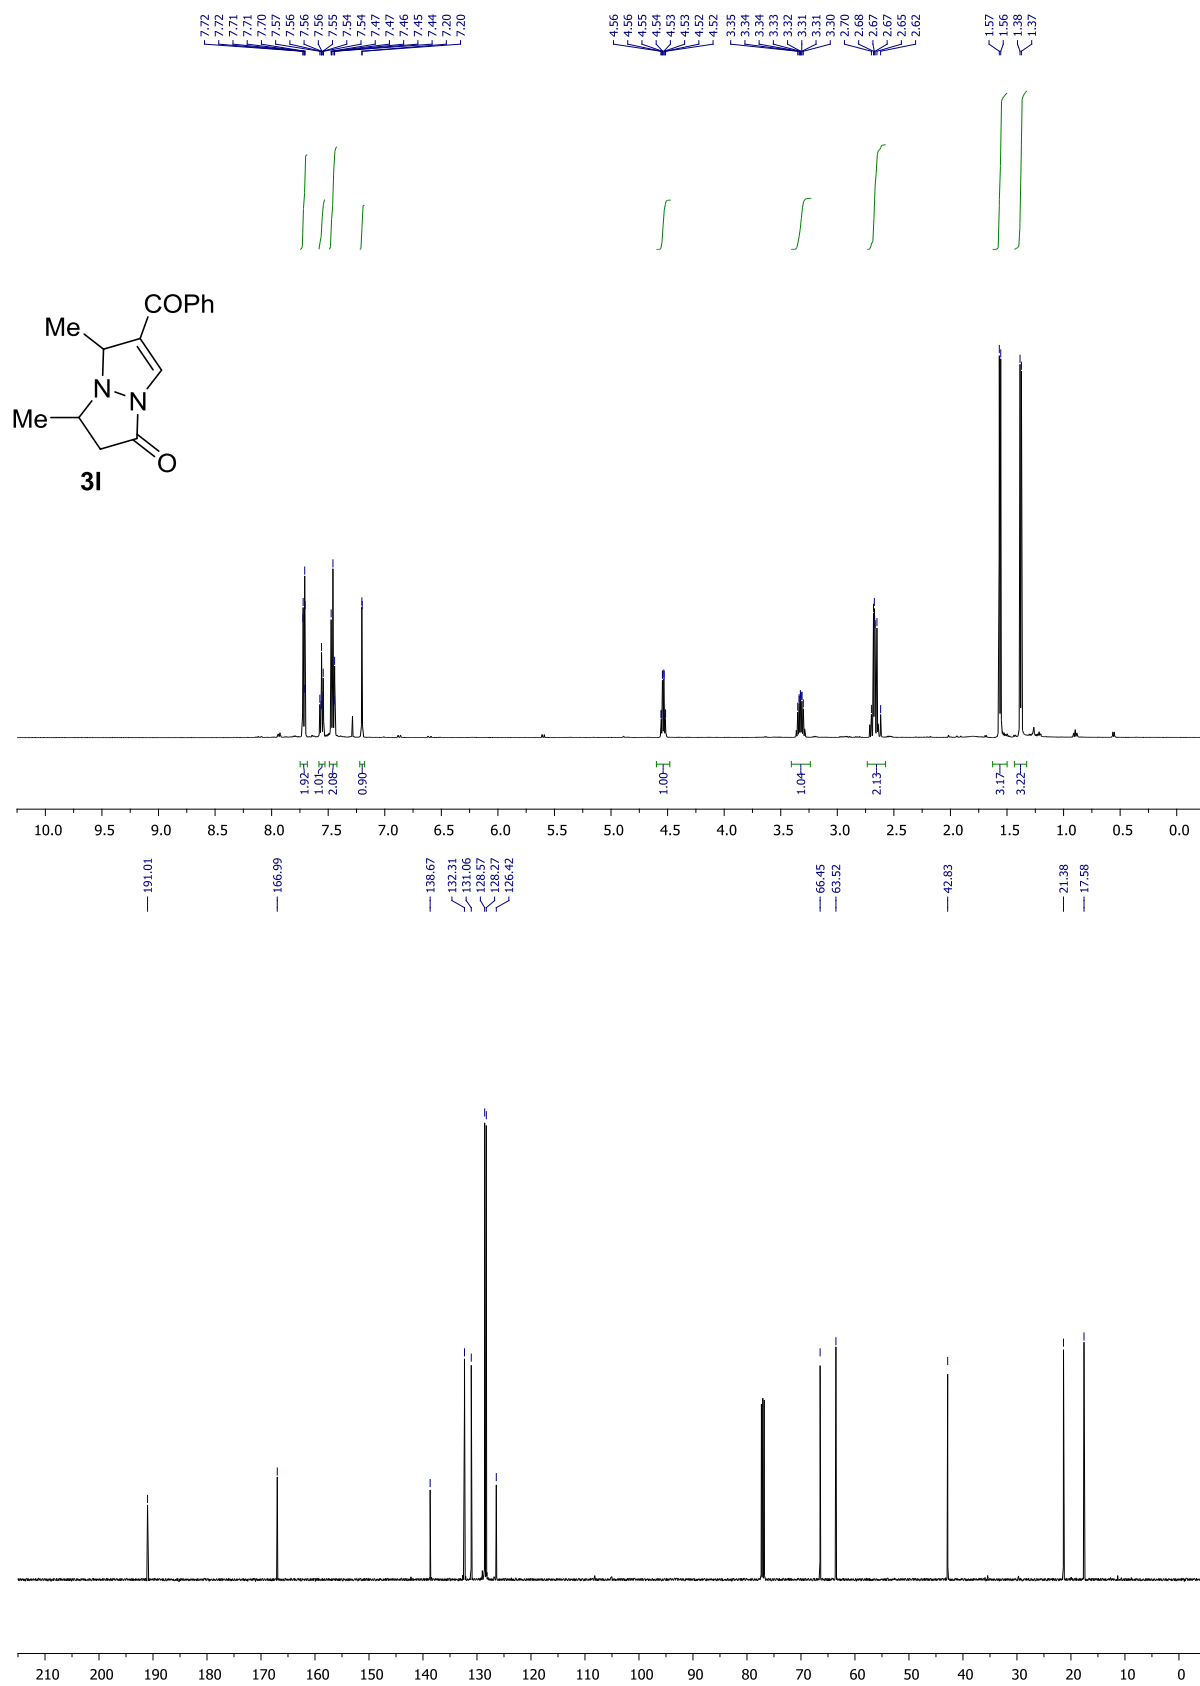

## 6. References

- [1] M. P. Sibi, L. Venkatraman, M. Liu, C. P. Jasperse, A New Approach to Enantiocontrol and Enantioselectivity Amplification: Chiral Relay in Diels–Alder Reactions. *J. Am. Chem. Soc.* **2001**, *123*, 8444–8445.
- [2] M. P. Sibi, L. M. Stanley, X. Nie, L. Venkatraman, M. Liu, C. P. Jasperse, The Role of Achiral Pyrazolidinone Templates in Enantioselective Diels–Alder Reactions: Scope, Limitations, and Conformational Insights. *J. Am. Chem. Soc.* **2007**, *129*, 395–405.
- [3] A. Bongers, P. J. Moon, A. M. Beauchemin, Kinetic Resolution of Azomethine Imines by Brønsted Acid Catalyzed Enantioselective Reduction. *Angew. Chem. Int. Ed.* **2015**, *54*, 15516–15519.
- [4] S. Adachi, N. Takeda, M. P. Sibi, Evaluation of Achiral Templates with Fluxional Brønsted Basic Substituents in Enantioselective Conjugate Additions. *Org. Lett.* **2014**, *16*, 6440–6443.
- [5] A. Novak, M. Štefanič, U. Grošelj, M. Hrast, M. Kasunič, S. Gobec, B. Stanovnik, J. Svete, A Simple Synthesis of Polyfunctionalized 4-Aminopyrazolidin-3-ones as ‘Aza-deoxa’ Analogs of D-Cycloserine. *Helv. Chim. Acta* **2014**, *97*, 245–267.
- [6] R. J. Fox, M. A. Schmidt, M. D. Eastgate, Strategy To Prepare 3-Bromo- and 3-Chloropyrazoles. *J. Org. Chem.* **2018**, *83*, 2830–2839.
- [7] M. Schulz, G. West, Photochemische Reaktionen von Pyrazolidon-(3)-betainen. II. Synthese der  $\beta$ -Hydrazino-isovaleriansäure. *J. Prakt. Chem.* **1973**, *315*, 711–716. Photochemical reactions of 3-pyrazolidinone betaines. II. Synthesis of  $\beta$ -hydrazino isovaleric acid
- [8] M. P. Sibi, D. Rane, L. M. Stanley, T. Soeta, Copper(II)-Catalyzed Exo and Enantioselective Cycloadditions of Azomethine Imines. *Org. Lett.* **2008**, *10*, 2971–2974.
- [9] C. Turk, J. Svete, B. Stanovnik, L. Golič, S. G.-Grdadolnik, A. Golobič, L. Selič, Regioselective 1,3-Dipolar Cycloadditions of (1Z)-1-(Arylmethylidene)-5,5-dimethyl-3-oxopyrazolidin-1-ium-2-ide Azomethine Imines to Acetylenic Dipolarophiles. *Helv. Chim. Acta* **2001**, *84*, 146–156.
- [10] H. Kawai, A. Kusuda, S. Nakamura, M. Shiro, N. Shibata, Catalytic Enantioselective Trifluoromethylation of Azomethine Imines with Trimethyl(trifluoromethyl)silane. *Angew. Chem. Int. Ed.* **2009**, *48*, 6324–6327.
- [11] Y. B. Koptelov, M. V. Sednev, R. R. Kostikov, (Z)-1-alkylidene- and 1-arylmethylidene-5,5-dimethyl-3-oxopyrazolidin-1-ium-2-ides and their cycloaddition to N-arylmaleimides. *Russ. J. Org. Chem.* **2012**, *48*, 804–814.
- [12] E. Pušavec Kirar, U. Grošelj, G. Mirri, F. Požgan, G. Strle, B. Štefane, V. Jovanovski, J. Svete, “Click” Chemistry: Application of Copper Metal in Cu-Catalyzed Azomethine Imine–Alkyne Cycloadditions. *J. Org. Chem.* **2016**, *81*, 5988–5997.
- [13] E. Pušavec Kirar, U. Grošelj, A. Golobič, F. Požgan, S. Pusch, C. Weber, L. Andernach, B. Štefane, T. Opatz, J. Svete, Absolute Configuration Determination of 2,3-Dihydro-1H,5H-pyrazolo[1,2-a]pyrazoles Using Chiroptical Methods at Different Wavelengths. *J. Org. Chem.* **2016**, *81*, 11802–11812.
- [14] J. Mirnik, E. P. Kirar, S. Ričko, U. Grošelj, A. Golobič, F. Požgan, B. Štefane, J. Svete, Cu<sup>0</sup>-catalysed 1,3-dipolar cycloadditions of  $\alpha$ -amino acid derived N,N-cyclic azomethine imines to ynones. *Tetrahedron* **2017**, *73*, 3329–3337.

- [15] J. Liu, S. Yang, R. Dong, Z. Jin, M. Wang, A Convenient One-Pot Synthesis of 1-Aryl-Substituted 4-Iodopyrazol-3-Ols via Aromatisation and Oxidative Iodination Reactions. *J. Chem. Res.* **2018**, *42*, 24–27.
- [16] C. Doebelin, M. Schmitt, C. Antheaume, J.-J. Bourguignon, F. Bihel, Nucleophilic Substitution of Azide Acting as a Pseudo Leaving Group: One-Step Synthesis of Various Aza Heterocycles. *J. Org. Chem.* **2013**, *78*, 11335–11341.
- [17] C. Yu, S. Shen, L. Jiang, J. Li, Y. Lu, T. Lia, C. Yao, NHC-catalyzed regiodivergent syntheses of difunctionalized 3-pyrazolidinones from  $\alpha$ -bromoenal and monosubstituted hydrazine. *Org. Biomol. Chem.* **2017**, *15*, 9149–9155.
- [18] W. Sucrow, M. Slopianka, Pyrazolium-Betaine aus 1,1-Dialkylhydrazinen und Acetylen-carbonsäureestern. *Chem. Ber.* **1978**, *111*, 780–790.
- [19] Y. Li, R. Liu, Z. Yan, X. Zhang, H. Zhu, Synthesis, Crystal Structure and Fungicidal Activities of New Type Oxazolidinone-Based Strobilurin Analogues. *Bull. Korean Chem. Soc.* **2010**, *31*, 3341–3347.
- [20] H. Koenig, N. Goetz, R. Kirstgen, B. Mueller, K. Oberdorf, Preparation of 1-(hetero)aryl-3-hydroxypyrazoles. Patent DE4415484A1, 1995.
- [21] S. Guillou, O. Nesmes, M. S. Ermolenko, Y. L. Janin, 4-Arylation of 3-alkoxy-pyrazoles. *Tetrahedron* **2009**, *65*, 3529–3535.
- [22] D. L. Selwood, D. G. Brummell, J. Budworth, G. E. Burtin, R. O. Campbell, S. S. Chana, I. G. Charles, P. A. Fernandez, R. C. Glen, M. C. Goggin, A. J. Hobbs, M. R. Kling, Q. Liu, D. J. Madge, S. Meillerais, K. L. Powell, K. Reynolds, G. D. Spacey, J. N. Stables, M. A. Tatlock, K. A. Wheeler, G. Wishart, C.-K. Woo, Synthesis and Biological Evaluation of Novel Pyrazoles and Indazoles as Activators of the Nitric Oxide Receptor, Soluble Guanylate Cyclase. *J. Med. Chem.* **2001**, *44*, 78–93.
